# Supplementary material
Source: publisher figshare collection journal article supplement (https://gsapubs.figshare.com/ndownloader/files/23307074)
Supplement: Supplementary file 1 [file 23307074]

Shi et al., 2018, Sulfur isotope evidence for transient marine-shelf oxidation during the Ediacaran Shuram Excursion: *Geology*, <https://doi.org/10.1130/G39663.1>.

## Geological Setting

The Doushantuo Formation was deposited on the South China Craton, a microcontinent thought to have been located at low Northern Hemisphere paleolatitudes (Fig. DR1A; Zhang et al., 2015), immediately after the last Neoproterozoic global-scale glaciation—the Marinoan (or ‘Nantuo’ in South China) Glaciation. This formation exhibits inner-shelf facies to the northwest and basinal facies to the southeast of the Yangtze Platform (Fig. DR1B-C). The Yangtze Platform was probably a rimmed platform during deposition of middle Doushantuo Formation, but there is no evidence for water-mass restriction of the South China Basin (Jiang et al., 2011). Yet new paleomagnetic evidence suggest that South China was most likely an isolated continental block during the Ediacaran and early Cambrian (Zhang et al., 2015), well connected with open-ocean all around.

The depositional interval of the Doushantuo Formation is constrained by zircon U-Pb ages of  $635.2 \pm 0.6$  Ma and  $551.1 \pm 0.7$  Ma from ash beds at its base and top (Condon et al., 2005; Zhang et al., 2005), yielding a duration of ~84 million years (Myr) representing most of the Ediacaran Period. The Doushantuo Formation, which overlies the Cryogenian Nantuo Formation and underlies the upper Ediacaran Dengying Formation, is subdivided into four

17 lithostratigraphic members (Members I-IV) ([Ding et al., 1996](#); [Zhu et al., 2003](#)). No  
18 evidence for significant erosional hiatuses within the formation has been reported, although  
19 small-scale unconformities in sedimentation may exist. Three transgressive-regressive (T-R)  
20 cycles are present in the Doushantuo and lower Dengying formations in their type area of  
21 the Yangtze Gorges. Cycle 1 begins with a transgression recorded by the basal cap carbonate  
22 overlain by deep subtidal shales/silty dolostone that exhibit parallel and wrinkle laminations  
23 (lower Member II), followed by a regression recorded by a shift to shallow subtidal  
24 carbonates with small-scale cross-lamination and phosphatic intraclasts (upper Member II).  
25 Cycle 2 begins above a sequence boundary near the Member II/III contact, with the  
26 transgressive phase recorded by laminated black shale and lime mudstones (lower Member  
27 III) and the regressive phase by phosphatic packstone exhibiting scour marks, low-angle  
28 cross-laminations, and microbial mats (upper Member III). Cycle 3 begins above another  
29 sequence boundary at the Member III/IV contact, with the transgressive phase recorded by  
30 deep subtidal black shales (Member IV) and the regressive phase by peritidal dolostones  
31 exhibiting tepee structures and karstification features (lower Dengying Formation) ([Jiang et](#)  
32 [al., 2011](#); [Zhu et al., 2003](#)). The Doushantuo Formation is also famous for its fossil animal  
33 embryos ([Yin et al., 2007](#)), macroscopic algae ([Yuan et al., 2011](#)), and abundant acritarchs,  
34 all of which are milestones in the evolution of multicellular life (see [Xiao et al., 2014](#)).

35 The carbonate carbon isotope chemostratigraphy of the Doushantuo Formation, which  
36 exhibits considerable variation in  $\delta^{13}\text{C}_{\text{carb}}$  values, has been reviewed in [Jiang et al.](#)  
37 [\(2007,2010\)](#), [Zhou and Xiao \(2007\)](#), [Zhu et al. \(2007\)](#), [Ader et al. \(2009\)](#), [Wang et al. \(2016\)](#),

38 and [Li et al. \(2017\)](#). Shallow-water, carbonate-rich sections in the Yangtze Gorges area are  
39 considered the most likely to have recorded a global  $\delta^{13}\text{C}_{\text{carb}}$  signature. In this area, three  
40 major negative  $\delta^{13}\text{C}_{\text{carb}}$  excursions, one each in the basal cap carbonate [Ediacaran Negative  
41 excursion 1 (EN1) or CAp carbonate Negative Carbon isotope Excursion (CANCE)], the  
42 middle [EN2 or BAIguoyuan Negative Carbon isotope Excursion (BAINCE)], and the upper  
43 Doushantuo Formation [EN3 or DOUshantuo Negative Carbon isotope Excursion  
44 (DOUNCE)], have been documented. These three negative excursions are separated by two  
45 Ediacaran Positive intervals (EP1 and EP2 in an ascending order) with  $\delta^{13}\text{C}_{\text{carb}}$  values of  
46  $\sim +5\text{‰}$ . However, the magnitude of the EN2 excursion varies among sections in the Yangtze  
47 Gorges area, and its global significance remains uncertain. In contrast, EN1 and EN3 have  
48 well-established correlative features in India ([Jiang et al., 2002](#); [Kaufman et al., 2006](#)),  
49 Oman ([Fike et al., 2006](#); [Le Guerroué et al., 2006](#); [Le Guerroué and Cozzi, 2010](#)), and  
50 Australia ([Calver, 2000](#); [Walter et al., 2000](#)) and, with lesser certainty, in Namibia ([Saylor et](#)  
51 [al., 1998](#); [Halverson et al., 2005](#)) and the western United States ([Kaufman et al., 2007](#)).

52 The Shuram Excursion (SE) represents the EN3/DOUNCE event, i.e., the uppermost of  
53 the three  $\delta^{13}\text{C}_{\text{carb}}$  anomalies of the Doushantuo Formation ([Zhu et al., 2007](#); [McFadden et al.,](#)  
54 [2008](#)). It is characterized in the Three Gorges area by a  $\sim 15\text{‰}$  negative shift from ca.  $+5\text{‰}$   
55 to  $-10\text{‰}$ . The stratigraphic interval of the SE exhibits a distinctive succession of  
56 lithologies, including dolostone and bedded chert passing upsection into  
57 limestone-dolostone rhythmites in Member III, overlain by a  $\sim 10\text{-m}$ -thick black,  
58 organic-rich shale with calcite concretions in Member IV ([McFadden et al., 2008](#); [An et al.,](#)

2015). In deep-water facies across the Yangtze Platform, the boundary between the Doushantuo Formation and the overlying Dengying or Liuchapo Formation is marked by a lithologic transition to characteristic chert (Jiang et al., 2007, 2011; Lu et al., 2013).

Within this sequence stratigraphic framework, the age of the SE can be roughly constrained by three chronological anchor points (Fig. 1): (1) ~551 Ma, a zircon U-Pb age from an ash bed ~85 cm below the top of the Member IV (black shales) in the Jiuqunao section, located ~20 km northwest of the Jiulongwan section (Condon et al., 2005). This age constrains the termination of the SE/EN3/DOUNCE event (e.g., Condon et al., 2005; Zhang et al., 2005; Jiang et al., 2007; Zhou and Xiao, 2007; Zhu et al., 2007; McFadden et al., 2008; Li et al., 2010, 2015; Sawaki et al., 2010; Lu et al., 2013; Kendall et al., 2015; Sahoo et al., 2016; Xiao et al., 2016; Zhou et al., 2017), although some uncertainties in regional stratigraphic correlation exist (e.g., An et al., 2015). (2) ~560 Ma, which corresponds to the base of the black shale unit (Member IV) of the uppermost Doushantuo Formation, an age from comprehensive stratigraphic correlation and estimates from Ediacaran Doushantuo age model (Kendall et al., 2015; Li et al., 2015). Given the zircon U-Pb ages of  $635.2 \pm 0.6$  Ma,  $632.5 \pm 0.5$  Ma, and  $551.1 \pm 0.7$  Ma from the base and top of the Doushantuo Formation (Condon et al., 2005), a simple age interpolation (cf. Saylor et al., 1998; Halverson et al., 2005) yields estimated ages for the two post-cap carbonate negative  $\delta^{13}\text{C}$  anomalies of ~595-587 Ma (EN2/BAINCE) and ~575-551 Ma (EN3/DOUNCE) (Jiang et al., 2007) and for the base of Member IV of ~560 Ma (Jiang et al., 2007; Kendall et al., 2015). These estimates are consistent with a Pb-Pb age of  $576 \pm 14$  Ma from the upper phosphorite layers

80 of the Doushantuo Formation at Weng'an ([Chen et al., 2004](#)), which can be correlated to  
81 Member III of the Doushantuo Formation in the Three Gorges area based on the similarity  
82 of acritarch fossils between the Jiulongwan and Weng'an sections (e.g., [Zhou et al., 2007](#);  
83 [Xiao et al., 2014](#)). Furthermore, these estimates are consistent with the occurrence of  
84 *Eoandromeda Octobrachiata* (Miaohe Biota) in the lower black shale, which is also found  
85 in the ~560-Ma Ediacara Member of the Rawnsley Quartzite of South Australia (cf. [Zhu et](#)  
86 [al., 2008](#)). (3) ~575 Ma, a rough age estimate for the base of the EP2. Stratigraphic analyses  
87 and Sr isotope data suggest that the SE is younger than the ~580-Ma Gaskiers Glaciation in  
88 South China ([Sawaki et al., 2010](#)), which has been correlated to a stratigraphic break (i.e.,  
89 EN2) located immediately below EP2 in the Doushantuo Formation ([Condon et al., 2005](#)).  
90 This arrangement is also consistent with the linear interpolation based on available  
91 Doushantuo U-Pb ages, which suggests an age of ~595-587 Ma for the EN2 and an age of  
92 ~575-551 Ma for the SE/EN3/DOUNCE ([Jiang et al., 2007](#)). Therefore, the onset date of the  
93 SE, as recorded by the Doushantuo Formation, can be roughly placed at 575 Ma.

94

## 95 **Study Sections**

96 Jiulongwan (JLW; 30°47'51"N, 110°59'32"E) and Sidouping (SDP: 28°55'01"N,  
97 110°27'00"E) are outcrop sections in Hubei Province and Hunan Province (South China),  
98 respectively. They represent an inner-shelf and an upper-slope setting, respectively,  
99 providing a representative proximal-to-distal transect across the Yangtze Platform ([Fig.](#)  
100 [DR1B-C; Zhu et al., 2013](#)). These sections contain ample carbonates in strata recording the

SE, allowing us to measure both  $\delta^{13}\text{C}_{\text{carb}}$  and  $\delta^{34}\text{S}_{\text{CAS}}$  and, thus, to investigate spatial variation in C-S cycling and its possible relationship to continental weathering fluxes (Jiang et al., 2010; Li et al., 2017).

At JLW, Member I corresponds to a ~5-m-thick cap carbonate exhibiting distinctive sedimentary structures/textures and negative  $\delta^{13}\text{C}_{\text{carb}}$  values (EN1; Jiang et al., 2003, 2006). Member II consists of alternating organic-rich black shale and thinly bedded dolostone with phosphatic chert nodules, from which abundant acanthomorphic acritarchs have been reported (Zhou et al., 2007; McFadden et al., 2008, 2009; Liu et al., 2013). Member III, which contains the peak negative  $\delta^{13}\text{C}$  excursion (EN3), consists of ~70 m of thin- to thick-bedded dolostone and limestone (Jiang et al., 2007; Zhou and Xiao, 2007; McFadden et al., 2008; Lu et al., 2013). Member IV comprises a ~10-m-thick organic-rich black shale unit directly underlying the Dengying Formation (Jiang et al., 2007; McFadden et al., 2008, Li et al., 2010, 2017). At SDP, the section consists mainly of cap carbonate, thinly-bedded black shale, and laminated microcrystalline limestone, and cherty dolostone, and shaly dolostone with abundant syndepositional folds, slump blocks, and olistostrome breccias (Jiang et al., 2007; Wang et al., 2016; Li et al., 2017) from base to top. The brecciated dolostone transitions to overlying organic-rich black shale, marking a major facies change similar to that of the Doushantuo Member III/Member IV contact in the Yangtze Gorges area.

The stratigraphic correlation between the JLW and SDP sections is based on litho-, sequence, and chemo-stratigraphic data, which were described in detail by Jiang et al. (2011),

Wang et al. (2016) and Li et al. (2017). The Doushantuo Formation in the JLW and SDP sections as well as in most sections across the Yangtze Platform contains two important stratigraphic markers, i.e., the cap carbonate and the Member IV black shale (Jiang et al., 2011; Zhu et al., 2013; Wang et al., 2016; Li et al., 2017), and comprises three sedimentary cycles. Cycle II at JLW starts with a dark-colored succession at Member □/II, which changes into thickly-bedded dolostone and limestone of Member III (~80-140 m above the boundary of Cap/Nantuo Formation) and into black shale of Member IV (~140-154 m above the boundary of Cap/Nantuo Formation; Cycle III) (McFadden et al., 2008; Jiang et al., 2011). Similar lithofacies changes through Cycles II–III are observed at SDP: from light-grey, thickly-bedded dolostone containing chert layers to shaly/muddy dolostone with banded dark-gray shale (70-115 m), thickly-bedded dolostone and limestone (115-145 m), a partially covered, 10-m-thick (145–155 m) interval of dolostone, a 5-m-thick (155–160 m) brecciated dolostone interval, followed by 6-m-thick (160–166 m) black shales with lenticular limestone and dolostone beds, which transit upwards into bedded cherts and silicified shales of the Liuchapo Formation (Jiang et al., 2011; Wang et al., 2016). In addition, an abrupt facies change that is regarded as a synchronous surface can be identified within the Doushantuo Formation at about 72 m at JLW and 67 m at SDP (Jiang et al., 2011).

Although large variations in  $\delta^{13}\text{C}_{\text{carb}}$  values have been observed in the Doushantuo Formation, at present carbon isotope stratigraphy remains critical to establishing correlations between the Doushantuo Formation and other time-equivalent strata globally. In the Yangtze

143 Gorges area, the magnitude and timing of the Shuram/DOUNCE event is well expressed  
144 across shelf-to-basin transects. Correlation based on  $\delta^{13}\text{C}$  chemostratigraphy between the  
145 JLW and SDP sections was carried out in previous studies (Wang et al., 2016; Li et al.,  
146 2017). Both sections show a similar pattern of three prominent negative  $\delta^{13}\text{C}_{\text{carb}}$  excursions  
147 (EN1-EN3) separated by two positive intervals (Ediacaran Positive excursion 1-2 or  
148 EP1-EP2; at ca. +5 ‰), consistent with  $\delta^{13}\text{C}_{\text{carb}}$  profiles from other locations in the Yangtze  
149 Gorges area (Zhou and Xiao, 2007; Li et al., 2017; Wang et al., 2016). The SE shows three  
150 distinct intervals of  $\delta^{13}\text{C}_{\text{carb}}$  variation at JLW from base to top: (i) a negative shift from +5  
151 ‰ during EP2 to -9 ‰ over ~20 m (EN3a), (ii) stable values of ca. -9 ‰ over ~33 m  
152 (EN3b), and (iii) a positive shift from -9 ‰ to -2 ‰ over >10 m (EN3c) (Fig. 1A). The  
153 deeper SDP section shows some differences in detail: (i) a negative shift from +5 ‰ during  
154 EP2 to +1.5 ‰ over ~5 m (EN3a), (ii) stable values of ca. +1.5 ‰ over ~60 m (EN3b), and  
155 (iii) a pronounced decline to a minimum of -8.3 ‰ followed by a positive shift to +0.1 ‰  
156 (EN3c) (Fig. 1B). Our model of secular variation in seawater sulfate concentrations during  
157 the SE is based on this subdivision. However, in view of the large increases of  $\delta^{34}\text{S}_{\text{CAS}}$  and  
158 [CAS] in the upper part of EN3b at JLW, we further subdivided EN3b into EN3b-1 and  
159 EN3b-2 in order to track high-frequency changes in the marine sulfur cycle. Similarly, we  
160 subdivided EN3c into EN3c-1 and EN3c-2 in order to distinguish pronounced increases and  
161 decreases of  $\delta^{34}\text{S}_{\text{CAS}}$  and [CAS] at SDP during this interval (Fig. 1).



## Analytical Methods

A total of 154 new samples were collected and analyzed from the JLW (57) and SDP (97) sections in this study, yielding paired  $\delta^{34}\text{S}_{\text{CAS}}\text{-}\delta^{34}\text{S}_{\text{py}}$  and [CAS] data. Samples were collected at intervals of 0.3 to 4 m throughout each section, with care taken to avoid shale beds. Weathered surfaces and obvious diagenetic phases were trimmed off prior to powdering. In the laboratory, samples were first crushed into granules, and then the freshest pieces were chosen and crushed to finer than 200 mesh using a Retsch RS 200 vibratory disc mill. Geochemical results are summarized in [Tables DR1 and DR4](#).

**Carbonate-associated sulfate (CAS) sulfur isotopes.** CAS was extracted using the method of [Burdett et al. \(1989\)](#) as modified by [Luo et al. \(2010\)](#). For each sample with TIC >3 %, ~20-50 g of powder was washed in a 10 % NaCl solution for 24 h, and after gravitational settling, the supernatant was aspirated and the residual powder was rinsed with 18.25 M $\Omega$  distilled water. These steps were repeated until no barite precipitate formed when saturated BaCl<sub>2</sub> solution (~250 g/L) was added to the supernatant (i.e., all sulfate was removed). The residual powder was then dissolved through slow addition of 4 M HCl and stirring until the reaction went to completion. About 125 mL of a saturated BaCl<sub>2</sub> solution was then added in order to precipitate dissolved sulfate as barium sulfate (BaSO<sub>4</sub>), which was dried and weighed for calculation of the CAS concentration (ppm) in the carbonate fraction of each sample after correction for the amount of insoluble material (assuming that all of the dissolved material was pure carbonate). The isotopic composition of dried BaSO<sub>4</sub> (representing recovered CAS, thus  $\delta^{34}\text{S}_{\text{CAS}}$ ) was measured on a Thermo Fisher Scientific

Delta V Plus isotope ratio mass spectrometer coupled with a Flash elemental analyzer in the State Key Laboratory of Biogeology and Environmental Geology, China University of Geosciences-Wuhan (CUG-W). Results are expressed in standard delta notation as per mille deviations relative to the international Vienna Cañon Diablo Troilite (VCDT) standard, where  $\delta^{34}\text{S} = [({}^{34}\text{S}/{}^{32}\text{S})_{\text{sample}} / ({}^{34}\text{S}/{}^{32}\text{S})_{\text{standard}} - 1] \times 1000 \text{ ‰}$ . Analytical reproducibility was generally better than  $\pm 0.2 \text{ ‰}$  ( $1\sigma$ ) calculated from replicate analyses of IAEA standards [NBS-127 (21.1‰), IAEA-SO-5 (0.49‰), IAEA-SO-6 (-34.05‰)].

**Pyrite extraction and sulfur isotopes.** Pyrite sulfur in whole-rock samples was extracted using the chromium reduction method (Canfield et al., 1986). Pyrite extractions were carried out in 20 ml concentrated HCl and 40 ml 1 M chromous chloride solutions for 2 h while heated under an  $\text{N}_2$  atmosphere. The pyrite sulfur was collected as silver sulfide, which was dried and weighed to determine pyrite sulfur concentrations. The resulting  $\text{Ag}_2\text{S}$  was combined with an excess of  $\text{V}_2\text{O}_5$  and combusted online for measurement of pyrite sulfur isotopic compositions ( $\delta^{34}\text{S}_{\text{py}}$ ) on a Thermo Fisher Scientific Delta V Plus isotope ratio mass spectrometer (IRMS) coupled with a Flash elemental analyzer at the State Key Laboratory of Biogeology and Environmental Geology (CUG-W). Results are expressed in standard delta notation as per mille deviations relative to VCDT with an analytical error better than  $\pm 0.2 \text{ ‰}$  ( $1\sigma$ ) calculated from replicate analyses of IAEA standards [IAEA-S1 (-0.3‰), IAEA-S2 (22.65‰), IAEA-S3 (-32.5‰)].

**Elemental concentrations.** About 50 mg of dried whole-rock sample powder was dissolved using a standard  $\text{HNO}_3$ -HF digestion as described below. The digestion step

included progressive acid treatments at 190 °C in a 15-ml Teflon bomb equipped with a screw cap to which HNO<sub>3</sub>-HF (1:1) and HNO<sub>3</sub> were sequentially added until complete digestion was achieved. Distilled HNO<sub>3</sub> and trace-metal-grade HF reagents were used for all samples. Following an evaporation procedure to remove concentrated acid, the sample was diluted with 2 % nitric acid, which was followed by analysis using either an Agilent 7700x inductively coupled plasma mass spectrometer (ICP-MS) for rare earth elements (REEs) or a Thermo Fisher ICAP 7400 inductively coupled plasma optical emission spectrometry (ICP-OES) for Fe, Ca, and Mg concentrations. Analytical errors are better than ±2.1 % for Fe, ±1 % for Ca, and ±0.6 % for Mg based on analyses of USGS (BCR-2, AGV-2, BHVO-2, RGM-2) and Chinese (GSR5) standards.

**Pyrite framboid size measurements.** Fifteen samples from JLW (7) and SDP (8) were selected for analysis of pyrite framboid size distributions. Two or three polished blocks of each sample (2 cm × 2 cm) were made for *in situ* observation and measurement of pyrite framboids with a FEI Quanta 200 scanning electron microscope (SEM) at the State Key Laboratory of Geological Processes and Mineral Resources (CUG-W). The spatial resolution of the secondary electron image of SEM is better than 3.5 µm. In backscattered electron (BSE) images, framboidal and euhedral pyrite crystals are easily distinguished by their shape and structure (Fig. DR7). The diameters of framboidal and euhedral pyrite crystals were measured directly on the SEM screen, with a precision of better than 0.1 µm.

## **Seawater Sulfate Concentration Model and Age Sensitivity Analysis**

## ***Rate method of seawater sulfate concentration estimation***

Paleo-seawater sulfate concentrations ( $[\text{SO}_4^{2-}]_{\text{sw}}$ ) were estimated using the “rate method” of [Algeo et al. \(2015\)](#), as modified from [Kurtz et al. \(2003\)](#) and [Kah et al. \(2004\)](#). In this method,  $[\text{SO}_4^{2-}]_{\text{sw}}$  is constrained based on two input parameters: (1) the difference in S-isotopic compositions between cogenetic sedimentary sulfate and sulfide ( $\Delta^{34}\text{S}_{\text{CAS-py}}$ ), and (2) the observed maximum rate of change in seawater sulfate  $\delta^{34}\text{S}$ , i.e.,  $\partial\delta^{34}\text{S}_{\text{CAS}}/\partial t(\text{max})$ . These two parameters are related to each other as a function of the mass of seawater sulfate ( $M_o$ ) and the burial flux of reduced (mainly pyrite) sulfur ( $F_{\text{py}}$ ) [see [Algeo et al. \(2015\)](#), for equations and derivations].  $[\text{SO}_4^{2-}]_{\text{sw}}$  is estimated from the relationship as follows:

$$\partial\delta^{34}\text{S}_{\text{CAS}}/\partial t = [F_{\text{in}} \times (\delta^{34}\text{S}_{\text{in}} - \delta^{34}\text{S}_{\text{sw}}) - F_{\text{py}} \times \Delta^{34}\text{S}] / M_o \quad (1)$$

$$[\text{SO}_4^{2-}]_{\text{sw}} = k_1 \times k_2 \times M_o \quad (2)$$

$F_{\text{in}}$  is the total input flux of sulfur to the ocean system from weathering, which is allowed to vary.  $\delta^{34}\text{S}_{\text{in}}$  represents the isotopic composition of fluxes associated with weathering and sulfate deposition,  $M_o$  is the mass of sulfate sulfur in the oceans (calculated), and  $\Delta^{34}\text{S}$  is the observed fractionation between oxidized and reduced sulfur reservoirs ( $\Delta^{34}\text{S} = \delta^{34}\text{S}_{\text{CAS}} - \delta^{34}\text{S}_{\text{py}}$ ). The terms  $k_1$  ( $= 10^6$ ) and  $k_2$  ( $= 2.22 \times 10^{-20} \text{ mM g}^{-1}$ ) are conversion constants. Because of a paucity of evaporites in the Precambrian and the small S-isotopic fractionation associated with their deposition, we disregard the evaporite burial sink flux (i.e.,  $F_{\text{evaporite}}$  and  $\delta^{34}\text{S}_{\text{evaporite}}$ ) in our calculations.

Secular variation in seawater sulfate  $\delta^{34}\text{S}$  is thought to be due mainly to changes in the proportions of the sink fluxes, with increasing (decreasing) burial of pyrite relative to sulfate

246 leading to more (less)  $^{34}\text{S}$ -enriched  $\delta^{34}\text{S}_{\text{sw}}$  (Bottrell and Newton, 2006; Halevy et al., 2012).

247 We varied  $\Delta^{34}\text{S}_{\text{CAS-py}}$  from 1 to 100 ‰ for five discrete log-interval values of  
248  $\partial\delta^{34}\text{S}_{\text{CAS}}/\partial t(\text{max})$  ranging from 1 to 100 ‰  $\text{Myr}^{-1}$  (Fig. DR2). From Equation 1, the  
249 maximum rate of isotope change is reached when S inputs to the ocean approach zero ( $F_{\text{in}} =$   
250 0) and the standing seawater sulfate reservoir is removed as pyrite ( $F_{\text{py}} = F_{\text{in}}$ ), giving:

251 
$$\partial\delta^{34}\text{S}_{\text{CAS}}/\partial t(\text{max}) = k_1 \times F_{\text{py}} \times \Delta^{34}\text{S} / M_o \quad (3)$$

252 Because observed values of  $\partial\delta^{34}\text{S}_{\text{CAS}}/\partial t(\text{max})$  are generally smaller than the theoretical  
253 maximum rate, the resulting estimates of  $[\text{SO}_4^{2-}]_{\text{sw}}$  are generally larger than actual seawater  
254 sulfate concentrations during the interval of interest. Thus,  $[\text{SO}_4^{2-}]_{\text{sw}}$  estimates based on  
255  $\partial\delta^{34}\text{S}_{\text{CAS}}/\partial t(\text{max})$  commonly represent *maximum* possible seawater sulfate concentrations for  
256 a given interval.

257 High maximum rates of change (i.e., large  $\partial\delta^{34}\text{S}_{\text{CAS}}/\partial t(\text{max})$ ) are associated with a  
258 small seawater sulfate reservoir, because  $\partial\delta^{34}\text{S}_{\text{CAS}}$  is not well-buffered in a low- $[\text{SO}_4^{2-}]_{\text{sw}}$   
259 system. In contrast, low maximum rates of changes (i.e.,  $\partial\delta^{34}\text{S}_{\text{CAS}}/\partial t \leq 0.7 \text{ ‰ Myr}^{-1}$ ) are  
260 observed since 65 Ma (Paytan et al., 1998) because of the high  $[\text{SO}_4^{2-}]_{\text{sw}}$  of Cenozoic oceans  
261 (e.g., 29 mM for the modern; Millero, 2005). Owing to lower atmospheric  $p\text{O}_2$  and evaporite  
262 weathering rates than in the modern,  $F_{\text{py}}$  was lower for Neoproterozoic oceans. Thus, a value  
263 of  $10 \times 10^{13} \text{ g yr}^{-1}$  is appropriate for the burial flux of sulfur in anoxic ancient oceans, in  
264 which pyrite sulfur is the dominant sink flux for seawater sulfate assuming a steady-state  
265 condition for the marine sulfur cycle (Song et al., 2014; Luo et al., 2015; Algeo et al., 2015).

Calculation of  $\partial\delta^{34}\text{S}_{\text{CAS}}/\partial t(\text{max})$  for a sedimentary unit of interest requires information regarding sedimentation rates, which can be highly uncertain for Proterozoic successions. One approach is to assume a range of typical sedimentation rates (e.g., [Kah et al., 2004](#)). Instead, we used recently published geochronological data in [Condon et al. \(2005\)](#), [Zhang et al. \(2005\)](#), [Kendall et al. \(2015\)](#), and [Wang et al. \(2016\)](#) for the onset of the Doushantuo SE (see sections above) to constrain sedimentation rates for each study unit based on its thickness and maximum possible duration. Our sedimentation rate estimates for the SE of the Doushantuo Formation are 4.0 m Myr<sup>-1</sup> for EP2-EN3b and 1.6 m Myr<sup>-1</sup> for EN3c at JLW, and 4.7 m Myr<sup>-1</sup> for EP2-EN3b and 2.5 m Myr<sup>-1</sup> for EN3c at SDP. For each unit,  $\partial\delta^{34}\text{S}_{\text{CAS}}/\partial t(\text{max})$  was calculated based on the largest measured isotopic shift defined by a minimum of three consecutive data points and the range of sedimentation rate estimates (i.e., average and maximum) as given in [Table DR3](#).

### *Age sensitivity analysis*

Our sulfate concentration model depends on the change rate of seawater sulfate isotope ( $\partial\delta^{34}\text{S}_{\text{CAS}}/\partial t$ ). Although our age model for the Doushantuo Formation is reasonably robust (see **Geological Setting**), there are uncertainties in two of the age-point anchors (i.e., at 575 and 560 Ma). Here, we consider a range of possible age errors and their potential influences on calculated rates in our model, and we undertake a simple sensitivity analyses to explore the parameter space of sediment accumulation rate.

Six age errors of -1, +1, -5, +5, -10, and +10 (Myr) are assumed for the 575 and 560 Ma age-point anchors to evaluate the sensitivity of calculated accumulation rates and modeled seawater sulfate concentrations. First, we modified just the 575 Ma age-point anchor by 1, 5, or 10 Myr, keeping all other age parameters constant. The results show that a  $\pm 1$ -Myr adjustment resulted in little change in accumulation rates and sulfate concentrations (Table DR5), a  $\pm 5$ -Myr adjustment resulted in moderate changes in accumulation rates and sulfate concentrations (Fig. 2; Table DR5), and a  $\pm 10$ -Myr adjustment resulted in large changes in accumulation rates and sulfate concentrations (Table DR5). However, we note that, although all age adjustments modify the absolute values of modeled  $[\text{SO}_4^{2-}]_{\text{sw}}$ , they do not affect secular trends in  $[\text{SO}_4^{2-}]_{\text{sw}}$  or differences in  $[\text{SO}_4^{2-}]_{\text{sw}}$  between the two study sections. For this reason, they do not impact our conclusions regarding a transient increase in seawater sulfate concentrations during the SE and a lateral sulfate gradient across the Yangtze Platform.

## Modeling results of marine sulfate concentrations in Oman

Model estimates of marine sulfate concentrations in the Ediacaran Shuram Formation of Oman (Fig. DR3; basic data are from Fike et al., 2006) share many features with the Doushantuo Shuram/DOUNCE event discussed in the main text. Due to limited dating data, model calculations are only divided into two intervals, i.e., before and after ~580 Ma (Gaskiers Glaciation), showing an increase in  $[\text{SO}_4^{2-}]_{\text{sw}}$  from <2 mM (Loyd et al., 2012; Osburn et al., 2015) to ~8 mM (mean in which the pyrite burial flux is equal to  $10 \times 10^{13}$  g

yr<sup>-1</sup> in an anoxic ocean). These data are generally consistent with a progressive oxidation of the SE ocean after the Gaskiers Glaciation. Although it is difficult to gauge absolute Ediacaran marine sulfate concentrations, our estimates for South China and Oman suggest that [SO<sub>4</sub><sup>2-</sup>]<sub>sw</sub> increased after the Gaskiers Glaciation but did not exceed ~10 mM in the shelf areas, which is appreciably lower than the modern value of 28.4 mM.

Given uncertainties in stratigraphic ages and sedimentation rates, the model estimates for the Oman Shuram [SO<sub>4</sub><sup>2-</sup>]<sub>sw</sub> can serve only as a rough guide. Firstly, the average deposition rate of the Shuram Formation in Oman is estimated to have been ~18 m Myr<sup>-1</sup>, which is somewhat over rapid for “rate method” modeling (ref. [Kah et al., 2004](#), [Loyd et al., 2012](#)). Secondly, there is no detailed age framework for subdivision of the Oman Shuram Formation, thus impeding an evaluation of the segmented evolution of [SO<sub>4</sub><sup>2-</sup>]<sub>sw</sub>, as for JLW and SDP in South China. The Shuram Excursion in Oman is limited only by two age constraints: ~580 Ma ([Sawaki et al., 2010](#)), and ~550 Ma for the mid-Buah (correlation with Doushantuo Formation, China; [Bowring et al., 2007](#); [Condon et al., 2005](#)). A detailed analysis of the Shuram Excursion in Oman is not possible owing to a lack of age constraints for the δ<sup>13</sup>C<sub>carb</sub> minimum ([Fike et al., 2006](#)) and an unconformity across the Khufai–Shuram boundary that probably includes the interval of the Gaskiers Glaciation.

## **Evaluation of Sulfate Residence Times in the Ediacaran Ocean**

In modern oceans, sulfate concentrations are uniformly ~29 mM with a source flux of 1.5 × 10<sup>18</sup> mol Myr<sup>-1</sup> ([Kump and Garrels, 1986](#)), and no lateral or vertical seawater gradients



exist. This condition reflects the fact that the seawater sulfate residence time (~13 Myr) is far longer than the oceanic mixing time of ~1-2 kyr. In order for a lateral sulfate gradient to exist, as observed in the present study of the Ediacaran Yangtze Platform, it requires the seawater sulfate residence time to be comparable to or shorter than the contemporaneous oceanic mixing time. Although the Ediacaran oceanic mixing time is unknown, it could theoretically be much longer than that of the modern ocean (~1-2 kyr) given widespread oceanic redox stratification and spatial heterogeneity (see review in [Bowyer et al., 2017](#)).

The residence time of Ediacaran seawater sulfate can be quantitatively estimated based on  $[\text{SO}_4^{2-}]_{\text{sw}}$  and riverine sulfate fluxes. We estimated the residence time ( $\tau$ ) of seawater sulfate during the SE interval by using a simple linear response system model ([Henderson, 1982](#)) (Fig. DR4). In the box for the seawater sulfate reservoir, change of reservoir mass per unit time ( $dM/dt$ ) is controlled by differences between riverine source ( $F_{\text{in}}$ ) and sediment sink ( $F_{\text{out}}$ ) fluxes, which are expressed as:

$$\frac{dM}{dt} = F_{\text{in}} - F_{\text{out}} \quad (4)$$

where the  $F_{\text{out}}$  is proportional to  $M$ ,

$$F_{\text{out}} = KM \quad (5)$$

and  $K$  is a rate constant. Then:

$$\frac{dM}{dt} = F_{\text{in}} - KM \quad (6)$$

Assuming the seawater sulfate reservoir is in a steady-state condition on a long (i.e., multi-million-year) timescale, then  $\frac{dM}{dt} = 0$ , and

$$\frac{1}{K} = \tau = \frac{M}{F_{\text{in}}} \quad (7)$$

In this case, the residence time ( $\tau$ ) shows a negative correlation with sulfate source fluxes ( $F_{in}$ ) and a positive correlation with oceanic sulfate reservoir, as shown in [Figure DR5](#). Thus, seawater sulfate residence times decline with decreasing marine sulfate reservoir mass and increasing sulfate weathering fluxes. Our modeling results indicate that if the Ediacaran oceanic sulfate reservoir were low to e.g.,  $\sim 0.3$  mM or  $\sim 0.1$  mM, then a seawater sulfate residence time of  $\sim 2000$  years would require a riverine sulfate flux only  $\sim 60\times$  to  $\sim 20\times$  the present flux (see red lines in [Fig. DR5](#); [Table DR6](#)).

These conditions may have been met on the Yangtze Platform during the SE. Earlier studies have inferred  $[SO_4^{2-}]_{sw}$  of  $<2$  mM for shallow carbonate platforms and lower for distal shelves before the SE (e.g., [Lloyd et al., 2012](#); [Osburn et al., 2015](#)), and our  $[SO_4^{2-}]_{sw}$  estimates for the SE is  $<\sim 3$  mM in distal areas beyond the upper-slope SDP ([Fig. 2](#)) during the SE; all of these values are consistent with average Ediacaran  $[SO_4^{2-}]_{sw}$  having been extremely low. Furthermore, the sulfate concentrations of modern fluvial systems are  $\sim 1.5$ - $7500$   $\mu$ M for streams and  $\sim 22$ - $600$   $\mu$ M for rivers, indicating a large variation of riverine sulfate fluxes (over 3 orders of magnitude) ([Meybeck and Helmer, 1989](#); [Chen et al., 2002](#)). As indicated by transient increases of our modeled  $[SO_4^{2-}]_{sw}$ , riverine sulfate weathering fluxes may have been greatly elevated during the SE. Elevated sulfate weathering fluxes are consistent with increases in marine carbonate  $^{87}\text{Sr}/^{86}\text{Sr}$  ratios from  $<0.708$  to  $>0.709$  in South China ([Sawaki et al., 2010](#)) and globally (see figure 5 of [Li et al., 2017](#)), probably as a consequence of the  $\sim 600$ - $550$  Ma Pan-African orogeny ([Ross et al., 1995](#); [Canfield, 2004](#)). Although accurate constraints on Ediacaran  $[SO_4^{2-}]_{sw}$  and sulfate weathering fluxes are

absent, the considerations above support a much shorter residence time of seawater sulfate and potentially longer oceanic mixing time for Ediacaran oceans. Thus, a lateral sulfate gradient potentially could have developed across continental shelves such as the Yangtze Platform during the Ediacaran.

## **Data Evaluation**

Diagenetic influences on primary marine carbonate signals (e.g.,  $\delta^{13}\text{C}_{\text{carb}}$ ) at study sections have been carefully evaluated in [Li et al. \(2017\)](#) by using combined stratigraphic, petrographic, mineralogical, and geochemical (e.g., Mn/Sr,  $\delta^{18}\text{O}_{\text{carb}}$  and cross plot of  $\delta^{13}\text{C}_{\text{carb}}$  versus  $\delta^{18}\text{O}_{\text{carb}}$ ) data, which indicate no to very limited burial diagenesis and thus primary marine carbonate signature preserved for the SE at study sections. In addition, previous study indicated that even intense meteoric diagenesis has very little effects on  $\delta^{34}\text{S}_{\text{CAS}}$  ([Gill et al., 2008](#)). We therefore conclude that our  $\delta^{34}\text{S}_{\text{CAS}}$  signatures are primary and that the [CAS] was not significantly modified although it is vulnerable to diagenetic resetting ([Gill et al., 2008](#)).

Pyrite and organic S are generally strongly  $^{34}\text{S}$ -depleted relative to co-occurring sulfate ([Zaback and Pratt, 1992](#)), and oxidation of pyrite during CAS extraction can significantly lower measured  $\delta^{34}\text{S}_{\text{CAS}}$  values ([Marenco et al., 2008a](#)). However, [CAS] does not show significant covariation with either total Fe ( $R^2 = 0.10$  at JLW and  $0.09$  at SDP; [Fig. DR6B](#)) or pyrite S ( $R^2 = 0.14$  at JLW and  $0.003$  at SDP; [Fig. DR6D](#)). Furthermore,  $\delta^{34}\text{S}_{\text{CAS}}$  exhibits no covariation with either total Fe or pyrite S ( $R^2 = 0.10$  at JLW and  $0.06$  at SDP, and  $R^2 =$

0.12 at JLW and 0.14 at SDP, respectively; Fig. DR6A, C). Collectively, these covariant relationships indicate that [CAS] and  $\delta^{34}\text{S}_{\text{CAS}}$  were not measurably influenced by oxidation of the pyrite or organic sulfur fractions of the sediment.

Ca/Mg ratios provide a measure of the degree of dolomitization of carbonate sediment, a process that can influence the sulfur isotopic composition of CAS (Marengo et al., 2008b). In the study sections, Ca/Mg ratios are mostly  $< 2$  in EP2 to EN3b-1 but  $> 20$  in EN3b-2 (Fig. DR6E-F), which accords with the lithologic descriptions given in above sections. However, neither [CAS] nor  $\delta^{34}\text{S}_{\text{CAS}}$  covaries significantly with Ca/Mg ratio (both  $R^2 \leq 0.20$ ; Fig. DR6E-F). We therefore infer that there is no evidence for the influence of dolomitization on our  $\delta^{34}\text{S}_{\text{CAS}}$  data.

## **Pyrite Framboid Size Distributions and Their Implications for Water-Column Formation of Pyrites**

Modern marine systems provide a guide for assessing whether pyrite crystals are syngenetic or diagenetic in origin based on their shapes and diameters (Wilkin and Barnes, 1996). Using scanning electron microscope (SEM) analysis, pyrite was found throughout the study section in the form of both framboids and euhedral crystals. As a common authigenic mineral, pyrite occurs as euhedral crystals or framboids in ancient anoxic facies. In euxinic water columns, pyrite forms near the chemocline and then sinks to the sediment-water interface. Owing to a critical threshold size for rapid sinking of framboids, they tend to exhibit relatively uniform and small sizes (generally  $< 10\ \mu\text{m}$ ) in the sediment. Beneath oxic

water columns, pyrite forms mainly in the sulfidic zone of the sediment column. Because of variation in the time-integrated availability of Fe and H<sub>2</sub>S in the porewater environment, any pyrite framboids formed there tend to show larger size (commonly with individual framboids exceeding 10 µm in diameter) and considerable size variation, and framboidal clusters and euhedral pyrite crystals can also form. In some cases, syngenetically formed framboids acquire diagenetic overgrowths in the burial environment (Wilkin and Barnes, 1996).

Micron-scale pyrite crystals are found randomly distributed and in isolation in studied samples of the SE interval. Three types of pyrite were identified during BSE investigation of our samples: (1) small framboids (< 10 µm, closely packed, spherical aggregates of uniform-sized microcrystals) of probable syngenetic origin (Fig. DR7A, B, F-H); (2) medium-size (10-14 µm) subhedral pyrite framboids, representing diagenetic overgrowths on syngenetic framboids (Fig. DR7C-D); and (3) large (>10 µm) euhedral pyrite crystals of diagenetic origin (Fig. DR7E). Where present, we measured >50 framboids in each sample. A large majority of the framboids (>93 %) are <10 µm in diameter (Fig. DR8) and likely formed in the water column (Wilkin and Barnes, 1996). The mean sizes of framboids vary to only a limited degree between samples, clustering around 7-9 µm, with standard deviations mostly <2 µm, which is consistent with a predominantly syngenetic origin (Fig. DR8). Sporadic larger framboids (>10 µm) may represent diagenetic precipitates or overgrowths on earlier-formed syngenetic framboids, as suggested by visible overgrowths on some individual crystals (Fig. DR7D-E).

## References

- Ader, M., Macouin, M., Trindade, R.I.F., Hadrien, M., Yang, Z., Sun, Z., and Besse, J., 2009, A multilayered water column in the Ediacaran Yangtze Platform? Insights from carbonate and organic matter paired  $\delta^{13}\text{C}$ : *Earth and Planetary Science Letters*, v. 288, p. 213-227.
- Algeo, T.J., Luo, G.M., Song, H.Y., Lyons, T.W., and Canfield, D.E., 2015, Reconstruction of secular variation in seawater sulfate concentrations: *Biogeosciences*, v. 12, p. 2131-2151.
- An, Z., Jiang, G., Tong, J., Tian, L., Ye, Q., Song, H.Y., and Song, H.J., 2015, Stratigraphic position of the Ediacaran Miaohu biota and its constraints on the age of the upper Doushantuo  $\delta^{13}\text{C}$  anomaly in the Yangtze Gorges area, South China: *Precambrian Research*, v. 271, p. 243-253.
- Bottrell, S.H., and Newton, R.J., 2006, Reconstruction of changes in global sulfur cycling from marine sulfate isotopes: *Earth-Science Reviews*, v. 75, p. 59-83.
- Bowring, S.A., Grotzinger, J.P., Condon, D.J., Ramezani, J., Newall, M.J., and Allen, P.A., 2007, Geochronologic constraints on the chronostratigraphic framework of the Neoproterozoic Huqf Supergroup, Sultanate of Oman: *American Journal of Science*, v. 307, p. 1097-1145.
- Bowyer, F., Wood, R.A., and Poulton, S.W., 2017, Controls on the evolution of Ediacaran metazoan ecosystems: A redox perspective: *Geobiology*, v. 15, p. 516-551.
- Burdett, J.W., Arthur, M.A. and Richardson, M.A., 1989, Neogene seawater sulfur isotope age curve from calcareous pelagic microfossils: *Earth and Planetary Science Letters*, v. 94, p. 189-198.
- Calver, C.R., 2000, Isotope stratigraphy of the Ediacarian (Neoproterozoic III) of the Adelaide Rift Complex, Australia, and the overprint of water column stratification: *Precambrian Research*, v. 100, p. 121-150.
- Canfield, D.E., 2004, The evolution of the Earth surface sulfur reservoir: *American Journal of Science*, v. 304, p. 839-861.
- Canfield, D.E., Raiswell, R., Westrich, J.T., Reaves, C.M., and Berner, R.A., 1986, The use of chromium reduction in the analysis of reduced inorganic sulfur in sediments and shales: *Chemical Geology*, v. 54, p. 149-155.
- Chen, D.F., Dong, W.Q., Zhu, B.Q., and Chen, X.P., 2004, Pb–Pb ages of Neoproterozoic Doushantuo phosphorites in South China: constraints on early metazoan evolution and glaciation events: *Precambrian Research*, v. 132, p. 123-132.
- Chen, J., Wang, F., Xia, X., and Zhang, L., 2002, Major element chemistry of the Changjiang (Yangtze River): *Chemical Geology*, v. 187, p. 231-255.
- Chen, Z., Zhou, C., Xiao, S., Wang, W., Guan, C., Hua, H., and Yuan, X., 2014, New Ediacara fossils preserved in marine limestone and their ecological implications: *Scientific Reports*, v. 4, p. 4180.
- Condon, D., Zhu, M., Bowring, W., Wang, W., Yang, A., and Jin, Y., 2005, U-Pb Ages from the Neoproterozoic Doushantuo Formation, China: *Science*, v. 308, p. 95-98.
- Ding, L., Li, Y., Hu, X., Xiao, Y., Su, C., and Huang, J., 1996, *Sinian Miaohu Biota*: Beijing, Geological Publishing House, 221 pp.
- Droser, M.L., and Gehling, J.G., 2015, The advent of animals: The view from the Ediacaran: *Proceedings of the National Academy of Sciences (U.S.A.)*, v. 112, p. 4865-4870.
- Fike, D.A., Grotzinger, J.P., Pratt, L.M., and Summons, R.E., 2006, Oxidation of the Ediacaran ocean: *Nature*, v. 444, p. 744-747.

- Gill, B.C., Lyons, T.W., and Frank, T.D., 2008, Behavior of carbonate-associated sulfate during meteoric diagenesis and implications for the sulfur isotope paleoproxy: *Geochimica et Cosmochimica Acta*, v. 72, p. 4699-4711.
- Halevy, I., Peters, S.E., and Fischer, W.W., 2012, Sulfate burial constraints on the Phanerozoic sulfur cycle: *Science*, v. 337, p. 331-334.
- Halverson, G.P., Hoffman, P.F., Schrag, D.P., Maloof, A.C., and Rice, A.H.N., 2005, Toward a Neoproterozoic composite carbon-isotope record: *Geological Society of America Bulletin*, v. 117, p. 1181-1207.
- Henderson, P., 1982, *Inorganic Geochemistry*, Pergamon, Oxford, 367 pp.
- Jiang, G., Christie-Blick, N., Kaufman, A.J., Banerjee, D.M., and Rai, V., 2002, Sequence stratigraphy of the Neoproterozoic Infra Krol Formation and Krol Group, Lesser Himalaya, India: *Journal of Sedimentary Research*, v. 72, p. 524-542.
- Jiang, G., Kennedy, M.J., and Christie-Blick, N., 2003, Stable isotopic evidence for methane seeps in Neoproterozoic postglacial cap carbonates: *Nature*, v. 426, p. 822-826.
- Jiang, G., Kennedy, M.J., Christie-Blick, N., Wu, H., and Zhang, S., 2006, Stratigraphy, sedimentary structures, and textures of the late Neoproterozoic Doushantuo cap carbonate in South China: *Journal of Sedimentary Research*, v. 76, p. 978-995.
- Jiang, G., Kaufman, A.J., Christie-Blick, N., Zhang, S., and Wu, H., 2007, Carbon isotope variability across the Ediacaran Yangtze platform in South China: Implications for a large surface-to-deep ocean  $\delta^{13}\text{C}$  gradient: *Earth and Planetary Science Letters*, v. 261, p. 303-320.
- Jiang, G., Wang, X., Shi, X., Zhang, S., Xiao, S., and Dong, J., 2010, Organic carbon isotope constraints on the dissolved organic carbon (DOC) reservoir at the Cryogenian-Ediacaran transition: *Earth and Planetary Science Letters*, v. 299, p. 159-168.
- Jiang, G., Shi, X., Zhang, S., Wang, Y., and Xiao, S., 2011, Stratigraphy and paleogeography of the Ediacaran Doushantuo Formation (ca. 635-551 Ma) in South China: *Gondwana Research*, v. 19, p. 831-849.
- Kah, L.C., Lyons, T.W., and Frank, T.D., 2004, Low marine sulphate and protracted oxygenation of the Proterozoic biosphere: *Nature*, v. 431, p. 834-838.
- Kaufman, A.J., Jiang, G., Christie-Blick, N., Banerjee, D.M., and Rai, V., 2006, Stable isotope record of the Neoproterozoic Krol Platform in the Lesser Himalaya of northern India: *Precambrian Research*, v. 147, p. 156-185.
- Kaufman, A.J., Corsetti, F.A., and Varni, M.A., 2007, The effect of rising atmospheric oxygen on carbon and sulfur isotope anomalies in the Neoproterozoic Johnnie Formation, Death Valley, USA: *Chemical Geology*, v. 237, p. 47-63.
- Kendall, B., Komiya, T., Lyons, T.W., Bates, S.M., Gordon, G.W., Romaniello, S.J., Jiang, G., Creaser, R.A., Xiao, S., McFadden, K., Sawaki, Y., Tahata, M., Shu, D., Han, J., Li, Y., Chu, X., and Anbar, A.D., 2015, Uranium and molybdenum isotope evidence for an episode of widespread ocean oxygenation during the late Ediacaran Period: *Geochimica et Cosmochimica Acta*, v. 156, p. 173-193.
- Kurtz, A.C., Kump, L.R., Arthur, M.A., Zachos, J.C., and Paytan, A., 2003, Early Cenozoic decoupling of the global carbon and sulfur cycles: *Paleoceanography*, v. 18, pp.
- Kump, L.R., Garrels, R.M., 1986, Modeling atmospheric  $\text{O}_2$  in the global sedimentary redox cycle: *American Journal of Science*, v. 286, p. 337-370.

517 Le Guerroué, E., and Cozzi, A., 2010, Veracity of Neoproterozoic negative C-isotope values: The  
518 termination of the Shuram negative excursion: *Gondwana Research*, v. 17, p. 653-661.

519 Le Guerroué, E., Allen, P.A., Cozzi, A., Etienne, J.L., and Fanning, M., 2006, 50 Myr recovery from the  
520 largest negative  $\delta^{13}\text{C}$  excursion in the Ediacaran ocean: *Terra Nova*, v. 18, p. 147-153.

521 Li, C., Love, G.D., Lyons, T.W., Fike, D.A., Sessions, A.L., and Chu, X., 2010, A stratified redox model  
522 for the Ediacaran ocean: *Science*, v. 328, p. 80-83.

523 Li, C., Hardisty, D.S., Luo, G., Huang, J., Algeo, T.J., Cheng, M., Shi, W., An, Z., Tong, J., Xie, S., Jiao,  
524 N., and Lyons, T.W., 2017, Uncovering the spatial heterogeneity of Ediacaran carbon cycling:  
525 *Geobiology*, v. 15, p. 211-224.

526 Li, C., Planavsky, N.J., Shi, W., Zhang, Z., Zhou, C., Cheng, M., Tarhan, L.G., Luo, G., and Xie, S., 2015,  
527 Ediacaran Marine Redox Heterogeneity and Early Animal Ecosystems: *Scientific Reports*, v. 5, p.  
528 17097.

529 Liu, P., Yin, C., Chen, S., Tang, F., and Gao, L., 2013, The biostratigraphic succession of acanthomorphic  
530 acritarchs of the Ediacaran Doushantuo Formation in the Yangtze Gorges area, South China and its  
531 biostratigraphic correlation with Australia: *Precambrian Research*, v. 225, p. 29-43.

532 Loyd, S.J., Marengo, P.J., Hagadorn, J.W., Lyons, T.W., Kaufman, A.J., Sour-Tovar, F., and Corsetti,  
533 F.A., 2012, Sustained low marine sulfate concentrations from the Neoproterozoic to the Cambrian:  
534 Insights from carbonates of northwestern Mexico and eastern California: *Earth and Planetary  
535 Science Letters*, v. 339-340, p. 79-94.

536 Lu, M., Zhu, M., Zhang, J., Shields-Zhou, G., Li, G., Zhao, F., Zhao, X., and Zhao, M., 2013, The  
537 DOUNCE event at the top of the Ediacaran Doushantuo Formation, South China: Broad  
538 stratigraphic occurrence and non-diagenetic origin: *Precambrian Research*, v. 225, p. 86-109.

539 Luo, G., Kump, L.R., Wang, Y., Tong, J., Arthur, M.A., Yang, H., Huang, J., Yin, H., and Xie, S., 2010,  
540 Isotopic evidence for an anomalously low oceanic sulfate concentration following end-Permian mass  
541 extinction: *Earth and Planetary Science Letters*, v. 300, p. 101-111.

542 Luo, G., Ono, S., Huang, J., Algeo, T.J., Li, C., Zhou, L., Robinson, A., Lyons, T.W., and Xie, S., 2015,  
543 Decline in oceanic sulfate levels during the early Mesoproterozoic: *Precambrian Research*, v. 258, p.  
544 36-47.

545 Marengo, P.J., Corsetti, F.A., Kaufman, A.J. and Bottjer, D.J., 2008a, Environmental and diagenetic  
546 variations in carbonate associated sulfate: an investigation of CAS in the Lower Triassic of the  
547 western USA: *Geochimica et Cosmochimica Acta*, v. 72, p. 1570-1582.

548 Marengo, P.J., Corsetti, F.A., Hammond, D.E., Kaufman, A.J., and Bottjer D. J., 2008b, Oxidation of  
549 pyrite during extraction of carbonate associated sulfate: *Chemical Geology*, v. 247, p. 124-132.

550 McFadden, K.A., Huang, J., Chu, X., Jiang, G., Kaufman, A.J., Zhou, C., Yuan, X., and Xiao, S., 2008,  
551 Pulsed oxidation and biological evolution in the Ediacaran Doushantuo Formation: *Proceedings of  
552 the National Academy of Sciences (U.S.A)*, v. 105, p. 3197-3202.

553 McFadden K A, Xiao S, Zhou C, et al. 2009. Quantitative Evaluation of the Biostratigraphic Distribution  
554 of Acanthomorphic Acritarchs in the Ediacaran Doushantuo Formation in the Yangtze Gorges Area,  
555 South China. *Precambrian Research*, 173: 170-190.

556 Meybeck, M., and Helmer, R., 1989, The quality of rivers: from pristine stage to global pollution:  
557 *Palaeogeography, Palaeoclimatology, Palaeoecology*, v. 75, p. 283-309.

558 Millero, F.J., 2005, *Chemical Oceanography*, 3<sup>rd</sup> ed., CRC Press, Boca Raton, Florida, 536 pp.



- Narbonne, G.M., 2005, The Ediacaran biota: Neoproterozoic origin of animals and their ecosystems: *Annual Review of Earth and Planetary Sciences*, v. 33, p. 421-442.
- Osburn, M.R., Owens, J., Bergmann, K.D., Lyons, T.W., and Grotzinger, J.P., 2015, Dynamic changes in sulfate sulfur isotopes preceding the Ediacaran Shuram Excursion: *Geochimica et Cosmochimica Acta*, v. 170, p. 204-224.
- Paytan, A., Kastner, M., Campbell, D., and Thiemens, M.H., 1998, Sulfur isotopic composition of Cenozoic seawater sulfate: *Science*, v. 282, p. 1459-1462.
- Ross, G.M., Bloch, J.D., and Krouse, H.R., 1995, Neoproterozoic strata of the southern Canadian Cordillera and the isotopic evolution of seawater sulfate: *Precambrian Research*, v. 73, p. 71-99.
- Sahoo, S.K., Planavsky, N.J., Jiang, G., Kendall, B., Owens, J.D., Wang, X., Shi, X., Anbar, A.D., and Lyons, T.W., 2016, Oceanic oxygenation events in the anoxic Ediacaran ocean: *Geobiology*, v. 14, p. 457-468.
- Sawaki, Y., Ohno, T., Tahata, M., Komiya, T., Hirata, T., Maruyama, S., Windley, B.F., Han, J., Shu, D., and Li, Y., 2010, The Ediacaran radiogenic Sr isotope excursion in the Doushantuo Formation in the Three Gorges area, South China: *Precambrian Research*, v. 176, p. 46-64.
- Saylor, B.Z., Kaufman, A.J., Grotzinger, J.P., and Urban, F., 1998, A composite reference section for terminal Proterozoic strata of southern Namibia: *Journal of Sedimentary Research*, v. 68, p. 1223-1235.
- Song, H.Y., Tong, J., Algeo, T.J., Song, H.J., Qiu, H., Zhu, Y., Tian, L., Bates, S., Lyons, T.W., Luo, G., and Kump, L.R., 2014, Early Triassic seawater sulfate drawdown: *Geochimica et Cosmochimica Acta*, v. 128, p. 95-113.
- Walter, M.R., Veevers, J.J., Calver, C.R., Gorjan, P., and Hill, A.C., 2000, Dating the 840-544 Ma Neoproterozoic interval by isotopes of strontium, carbon, and sulfur in seawater, and some interpretative models: *Precambrian Research*, v. 100, p. 371-433.
- Wang, X., Jiang, G., Shi, X., and Xiao, S., 2016, Paired carbonate and organic carbon isotope variations of the Ediacaran Doushantuo Formation from an upper slope section at Siduping, South China: *Precambrian Research*, v. 273, p. 53-66.
- Wilkin, R.T., and Barnes, H.L., 1996, Pyrite formation by reactions of iron monosulfides with dissolved inorganic and organic sulfur species: *Geochimica et Cosmochimica Acta*, v. 60, p. 4167-4179.
- Xiao, S., and Laflamme, M., 2009, On the eve of animal radiation: phylogeny, ecology and evolution of the Ediacara biota: *Trends in Ecology & Evolution*, v. 24, p. 31-40.
- Xiao, S., Muscente A.D., Chen, L., Zhou, C., Schiffbauer, J.D., Wood, A.D., Polys, N.F., and Yuan, X., 2014, The Weng'an biota and the Ediacaran radiation of multicellular eukaryotes: *National Science Review*, v. 1, p. 498-520.
- Xiao, S., Narbonne, G.M., Zhou, C., Laflamme, M., Grazhdankin, D.V., Moczydlowska-Vidal, M., and Cui, H., 2016, Towards an Ediacaran Time Scale: Problems, Protocols, and Prospects: *Episodes*, v. 39, p. 540-555.
- Yin, L., Zhu, M., Knoll, A.H., Yuan, X., Zhang, J., and Hu, J., 2007, Doushantuo embryos preserved inside diapause egg cysts: *Nature*, v. 446, p. 661-663.
- Yuan, X., Chen, Z., Xiao, S., Zhou, C., and Hua, H., 2011, An early Ediacaran assemblage of macroscopic and morphologically differentiated eukaryotes: *Nature*, v. 470, p. 390-393.

- Zaback, D.A., and Pratt, L.M., 1992, Isotopic composition and speciation of sulfur in the Miocene Monterey Formation: reevaluation of sulfur reactions during early diagenesis in marine environments: *Geochimica et Cosmochimica Acta*, v. 56, p. 763-774.
- Zhang, S., Jiang, G., Zhang, J., Song, B., Kennedy, M.J., and Christie-Blick, N., 2005, U-Pb sensitive high-resolution ion microprobe ages from the Doushantuo Formation in south China: Constraints on late Neoproterozoic glaciations: *Geology*, v. 33, p. 473-476.
- Zhang, S., Li, H., Jiang, G., Evans, D.A.D., Dong, J., Wu, H., Yang, T., Liu, P., and Xiao, Q., 2015, New paleomagnetic results from the Ediacaran Doushantuo Formation in South China and their paleogeographic implications: *Precambrian Research*, v. 259, p. 130-142.
- Zhou, C., and Xiao, S., 2007, Ediacaran  $\delta^{13}\text{C}$  chemostratigraphy of South China: *Chemical Geology*, v. 237, p. 89-108.
- Zhou, C., Xie, G., McFadden, K., Xiao, S., and Yuan, X., 2007, The diversification and extinction of Doushantuo-Pertatataka acritarchs in South China: causes and biostratigraphic significance: *Geological Journal*, v. 42, p. 229-262.
- Zhou, C., Xiao, S., Wang, W., Guan, C., Ouyang, Q., and Chen, Z., 2017, The stratigraphic complexity of the middle Ediacaran carbon isotopic record in the Yangtze Gorges area, South China, and its implications for the age and chemostratigraphic significance of the Shuram excursion: *Precambrian Research*, v. 288, p. 23-38.
- Zhu, M., Gehling, J.G., Xiao, S., Zhao, Y., and Droser, M.L., 2008, Eight-armed Ediacara fossil preserved in contrasting taphonomic windows from China and Australia: *Geology*, v. 36, p. 867-870.
- Zhu, M., Zhang, J., Steiner, M., Yang, A., Li, G., and Erdtmann, B., 2003, Sinian-Cambrian stratigraphic framework for shallow- to deep-water environments of the Yangtze Platform: an integrated approach: *Progress in Natural Science*, v. 13, p. 951-960.
- Zhu, M., Zhang, J., and Yang, A., 2007, Integrated Ediacaran (Sinian) chronostratigraphy of South China: *Palaeogeography, Palaeoclimatology, Palaeoecology*, v. 254, p. 7-61.
- Zhu, M., Lu, M., Zhang, J., Zhao, F., Li, G., Yang, A., Zhao, X., and Zhao, M., 2013, Carbon isotope chemostratigraphy and sedimentary facies evolution of the Ediacaran Doushantuo Formation in western Hubei, South China: *Precambrian Research*, v. 225, p. 7-28.

628 **Supplementary Tables**629 Table DR1: Carbon-sulfur geochemical data of the study sections <sup>a</sup>

630

| Sample                                            | Depth                   | Estimated   | TIC     | $\delta^{13}\text{C}_{\text{carb}}$ | $\delta^{34}\text{S}_{\text{py}}$ | $\delta^{34}\text{S}_{\text{CAS}}$ | $\Delta^{34}\text{S}_{\text{CAS-Py}}$ | [CAS]                 |
|---------------------------------------------------|-------------------------|-------------|---------|-------------------------------------|-----------------------------------|------------------------------------|---------------------------------------|-----------------------|
|                                                   | (m above<br>Nantuo Fm.) | age<br>(Ma) | (wt. %) | (‰ VPDB)                            | (‰ VCDT)                          | (‰ VCDT)                           | (‰ VCDT)                              | (ppm in<br>carbonate) |
| <i>1. Jiulongwan Section (Inner shelf facies)</i> |                         |             |         |                                     |                                   |                                    |                                       |                       |
| HN-23                                             | 154                     | 551         | 1.1     | -5.3                                | -13.5                             |                                    |                                       |                       |
| HN-21                                             | 152                     | 552.3       | 3.7     | -4.4                                | -15.7                             | 14.2                               | 29.9                                  | 686.6                 |
| HN-20                                             | 151                     | 552.9       | 1.0     | -5.6                                |                                   | 17.4                               |                                       | 1390.1                |
| HN-19                                             | 150                     | 553.6       | 1.4     | -6.6                                |                                   | 16.7                               |                                       | 794.2                 |
| HN-18                                             | 149                     | 554.2       | 1.6     | -6.4                                | -13.8                             | 15.5                               | 29.3                                  | 795.1                 |
| HN-17                                             | 148                     | 554.9       | 1.3     | -7.2                                |                                   | 19.2                               |                                       | 393.6                 |
| HN-16                                             | 147                     | 555.5       | 0.5     | -7.4                                |                                   |                                    |                                       | 5064                  |
| HN-15                                             | 146                     | 556.2       | 1.8     | -7.9                                | -10.9                             | 16.2                               | 27.1                                  | 1026.7                |
| HN-13                                             | 144                     | 557.4       | 1.1     | -7.8                                | -7.7                              |                                    |                                       |                       |
| HN-09                                             | 144                     | 557.4       | 0.9     | -8.3                                | -7.4                              |                                    |                                       |                       |
| HN-12                                             | 143                     | 558.1       | 0.8     | -7.8                                | -6.1                              |                                    |                                       |                       |
| HN-11                                             | 142.2                   | 558.6       | 0.6     | -6.4                                | -10.7                             |                                    |                                       |                       |
| JLW-01                                            | 142                     | 558.7       | 10.4    | -7.8                                | -13.4                             |                                    |                                       | 422.2                 |
| HN-08                                             | 141.5                   | 559         | 11.0    | -8.6                                | -13.6                             | 34.3                               | 47.9                                  | 3263.9                |
| JLW-02                                            | 141.3                   | 559.2       | 10.5    | -7.7                                |                                   |                                    |                                       |                       |
| HN-10                                             | 140.9                   | 559.4       | 10.8    | -8.7                                | -7.6                              |                                    |                                       | 12.4                  |
| JLW-03                                            | 140.6                   | 559.6       | 10.6    | -7.7                                | -5.9                              | 25.2                               | 31.1                                  | 586.4                 |
| JLW-04                                            | 140.3                   | 559.8       | 11.9    | -7.5                                | -11.6                             | 25.7                               | 37.3                                  | 942.9                 |
| HN-06                                             | 140                     | 560         | 10.6    | -7.8                                | -8.0                              | 29.7                               | 37.7                                  | 118.9                 |
| JLW-05                                            | 139.9                   | 560         | 9.5     | -7.9                                |                                   |                                    |                                       |                       |
| JLW-06                                            | 139                     | 560.3       | 10.7    | -8.0                                | -8.0                              | 19.7                               | 27.7                                  | 1127.2                |
| HN-07                                             | 138.5                   | 560.4       | 10.8    | -8.2                                | -6.9                              |                                    |                                       |                       |
| JLW-07                                            | 138.2                   | 560.5       | 11.2    | -8.5                                |                                   |                                    |                                       |                       |
| JLW-08                                            | 137.1                   | 560.7       | 10.4    | -8.4                                | -3.5                              | 13.9                               | 17.4                                  | 731.8                 |
| JLW-09                                            | 136                     | 561         | 11.4    | -8.3                                |                                   |                                    |                                       |                       |
| JLW-10                                            | 135                     | 561.3       |         | -8.4                                | -8.8                              | 13.5                               | 22.3                                  |                       |
| JLW-11                                            | 134.2                   | 561.5       | 10.5    | -8.4                                |                                   |                                    |                                       |                       |
| JLW-12                                            | 133.6                   | 561.6       | 10.1    | -8.4                                | -16.2                             |                                    |                                       | 283.3                 |
| JLW-13                                            | 132.7                   | 561.8       | 11.1    | -8.5                                |                                   |                                    |                                       |                       |
| JLW-14                                            | 132                     | 562         | 11.4    | -8.5                                | -13.6                             | 15.8                               | 29.4                                  | 264.6                 |
| JLW-15                                            | 131                     | 562.3       | 11.1    | -8.5                                |                                   |                                    |                                       |                       |

|        |       |       |      |      |      |      |      |       |
|--------|-------|-------|------|------|------|------|------|-------|
| JLW-16 | 130   | 562.5 | 10.1 | -8.6 |      | 18.5 |      | 879.2 |
| JLW-17 | 129   | 562.8 | 10.6 | -8.7 |      |      |      |       |
| JLW-18 | 128.3 | 562.9 | 11.3 | -8.8 | 4.7  | 18.4 | 13.7 | 844.7 |
| JLW-19 | 127   | 563.3 | 12.2 | -8.8 |      |      |      |       |
| JLW-20 | 126.2 | 563.5 | 10.8 | -8.9 |      |      |      |       |
| JLW-21 | 125.2 | 563.7 | 10.1 | -8.9 | 3.7  | 18.4 | 14.7 | 816.2 |
| JLW-22 | 124.2 | 564   | 10.3 | -8.7 |      |      |      |       |
| JLW-23 | 123.2 | 564.2 | 10.5 | -9.0 | -7.1 | 15.5 | 22.6 | 323.1 |
| JLW-24 | 122   | 564.5 | 9.6  | -9.0 |      |      |      |       |
| JLW-25 | 121.2 | 564.7 | 10.5 | -9.0 | 14.2 | 20.2 | 6.0  | 409.5 |
| JLW-26 | 120   | 565   | 10.2 | -9.1 | 4.0  |      |      | 701.5 |
| JLW-27 | 119.4 | 565.2 | 11.7 | -9.1 |      |      |      |       |
| JLW-28 | 118.6 | 565.4 | 10.0 | -9.1 |      |      |      |       |
| JLW-29 | 118   | 565.5 | 10.5 | -9.0 | 0.2  | 14.6 | 14.4 | 602.9 |
| JLW-30 | 117   | 565.8 | 10.5 | -8.9 |      |      |      |       |
| JLW-31 | 116   | 566   | 11.1 | -9.1 | -4.8 |      |      |       |
| JLW-32 | 115   | 566.3 | 8.5  | -8.7 |      | 21.3 |      | 969.1 |
| JLW-33 | 114   | 566.5 | 10.1 | -7.8 | 3.8  | 28.3 | 24.5 | 923.8 |
| HN-05  | 113.3 | 566.7 | 10.3 | -9.1 | -2.9 | 20.8 | 23.7 |       |
| JLW-34 | 113   | 566.8 | 10.3 | -6.3 |      |      |      |       |
| JLW-35 | 112   | 567   | 11.6 | -5.4 | -1.5 | 17.2 | 18.7 | 304.9 |
| JLW-36 | 111   | 567.3 | 8.9  | -6.4 |      |      |      |       |
| JLW-37 | 110.7 | 567.3 | 9.8  | -6.1 |      |      |      |       |
| JLW-38 | 109.6 | 567.6 | 12.2 | -5.1 |      | 26.3 |      |       |
| JLW-39 | 108.6 | 567.9 | 3.5  | -2.0 |      |      |      |       |
| JLW-40 | 107.7 | 568.1 | 14.2 | -2.7 |      | 19.9 |      | 447.8 |
| JLW-41 | 106.6 | 568.4 | 11.7 | -1.8 |      |      |      |       |
| JLW-42 | 105.6 | 568.6 | 11.6 | -1.3 | 8.0  | 18.6 | 10.6 | 480.2 |
| HN-04  | 105   | 568.8 | 9.6  | -8.1 | 2.4  |      |      |       |
| JLW-43 | 104.6 | 568.9 | 10.2 | -0.8 | 2.0  | 28.3 |      |       |
| JLW-44 | 103.7 | 569.1 | 11.2 | -0.2 |      |      |      |       |
| JLW-45 | 102.7 | 569.3 | 12.0 | -0.1 |      |      |      |       |
| JLW-46 | 101.7 | 569.6 | 10.4 | 2.7  |      |      |      | 615.1 |
| JLW-47 | 100.8 | 569.8 | 10.4 | 2.9  |      |      |      |       |
| JLW-48 | 99.8  | 570.1 | 12.0 | 2.9  | 0.6  | 29.9 | 29.3 |       |
| JLW-49 | 98.8  | 570.3 | 8.9  | 3.5  |      |      |      |       |
| HN-02  | 98    | 570.5 | 12.3 | -2.7 | -6.1 |      |      |       |
| JLW-50 | 97.8  | 570.6 | 11.2 | 2.6  | -3.2 | 33.3 | 36.5 | 528.9 |
| JLW-51 | 96.8  | 570.8 | 11.8 | 3.2  | 10.4 |      |      |       |
| JLW-52 | 95.8  | 571.1 | 11.1 | 4.0  |      |      |      |       |
| JLW-53 | 94.8  | 571.3 |      | 4.3  |      |      |      |       |

|                                                 |       |       |       |      |      |      |      |       |
|-------------------------------------------------|-------|-------|-------|------|------|------|------|-------|
| JLW-54                                          | 93.8  | 571.6 | 9.2   | 4.5  | 30.0 | 36.4 | 6.4  | 422.1 |
| JLW-55                                          | 92.8  | 571.8 | 10.8  | 4.8  |      |      |      |       |
| HN-01                                           | 92    | 572   | 11.8  | 0.3  | 11.5 |      |      |       |
| JLW-56                                          | 91.6  | 572.1 | 10.7  | 4.4  |      | 29.7 |      | 73.7  |
| JLW-57                                          | 91    | 572.3 | 10.6  | 4.5  |      |      |      |       |
| SSFT-12.6                                       | 83.6  | 574.1 |       |      | 21.9 | 35.9 | 14.0 |       |
| SSFT-11.58                                      | 82.9  | 574.3 |       |      | 20.1 |      |      |       |
| SSFT-9.8                                        | 80.8  | 574.8 |       |      | 30.2 |      |      |       |
| SSFT-9.0                                        | 80    | 575   |       |      | 29.8 | 39.0 | 9.2  |       |
| <b>2. Siduping Section (Upper slope facies)</b> |       |       |       |      |      |      |      |       |
| SDP-154                                         | 166.1 | 551   | 0     |      | 3.3  |      |      |       |
| SDP-155                                         | 165.9 | 551.1 | 0.18  |      | 3.9  |      |      |       |
| SDP-156                                         | 165.5 | 551.2 | 0     |      | 5.0  |      |      |       |
| SDP-159                                         | 164.9 | 551.5 | 0     |      | 14.1 |      |      |       |
| SDP-161                                         | 163.7 | 551.9 | 0.01  |      | -0.6 |      |      |       |
| SDP-163                                         | 162.9 | 552.3 | 3.03  |      | 9.7  |      |      |       |
| SDP-164                                         | 162.3 | 552.5 | 0     |      | -5.9 |      |      |       |
| SDP-166                                         | 161.7 | 552.8 | 0.28  |      | 1.6  |      |      |       |
| SDP-167                                         | 161.4 | 552.9 | 0.06  |      | 2.5  |      |      |       |
| SDP-168                                         | 161.1 | 553   | 0.21  |      | -1.2 |      |      |       |
| SDP-169                                         | 161   | 553   | 13.2  | -8.0 |      |      |      |       |
| SDP-170                                         | 160.7 | 553.1 |       | -8.3 | -4.3 |      |      |       |
| SDP-171                                         | 160.4 | 553.3 | 12.32 | -2.2 |      |      |      |       |
| SDP-172                                         | 160.1 | 553.4 | 10.72 | -1.7 | 3.8  | 6.3  | 2.5  | 147   |
| SDP-173                                         | 159.9 | 553.5 | 11.27 | -2.0 |      |      |      |       |
| SDP-174                                         | 159.6 | 553.6 | 7.29  | -1.4 | 2.3  | 6.9  | 4.6  | 169.5 |
| SDP-175                                         | 159.4 | 553.7 | 10.33 | -2.6 |      |      |      |       |
| SDP-177                                         | 159   | 553.8 | 4.04  | 0.1  | -0.6 |      |      |       |
| SDP-178                                         | 158.6 | 554   | 11.18 | -2.4 | 1.5  | 5.1  | 3.6  | 82    |
| SDP-179                                         | 158.3 | 554.1 | 12.05 | -2.9 | 8.3  |      |      |       |
| SDP-180                                         | 157.9 | 554.3 | 10.25 | -4.9 | 5.5  | 7.2  | 1.7  | 92.8  |
| SDP-181                                         | 157.4 | 554.5 | 12.24 | -2.4 | 7.8  | 10.6 | 2.8  | 32.6  |
| SDP-182                                         | 157.2 | 554.6 | 13.3  | -5.3 |      |      |      |       |
| SDP-183                                         | 156.6 | 554.8 | 11.37 | -5.7 | 4.8  | 9.5  | 4.7  | 19.2  |
| SDP-184                                         | 156.2 | 554.9 | 9.89  | -5.7 |      |      |      |       |
| SDP-185                                         | 156   | 555   |       |      | 3.5  |      |      |       |
| SDP-186                                         | 155.8 | 555.1 | 0     |      | -7.1 |      |      |       |
| SDP-188                                         | 155.6 | 555.2 | 0     |      | -8.6 |      |      |       |
| SDP-191                                         | 155.2 | 555.3 | 2.8   |      | -0.6 | 27.4 | 28.0 | 726   |
| SDP-192                                         | 155   | 555.4 | 12.48 | -6.2 |      |      |      |       |

|         |       |       |       |      |       |      |      |       |
|---------|-------|-------|-------|------|-------|------|------|-------|
| SDP-193 | 154.5 | 555.6 | 1.72  | -5.2 | -6.0  |      |      |       |
| SDP-194 | 154.1 | 555.8 | 11.1  | -5.5 |       |      |      |       |
| SDP-195 | 152.8 | 556.3 | 11.49 | -7.3 | -0.4  |      |      |       |
| SDP-197 | 150.7 | 557.1 | 11.34 | -5.4 | -6.2  | 16.1 | 22.3 | 93.4  |
| SDP-198 | 150.2 | 557.3 | 10.07 | -4.7 |       |      |      |       |
| SDP-199 | 149.4 | 557.7 | 11.61 | -3.1 |       |      |      |       |
| SDP-200 | 148.4 | 558.1 | 11.62 | -3.2 | -10.9 | 0.7  | 11.6 | 71.2  |
| SDP-201 | 148   | 558.2 | 4.01  | -3.9 |       |      |      |       |
| SDP-202 | 146   | 559   | 7.74  | -3.6 |       |      |      |       |
| SDP-215 | 145   | 559.4 | 11.49 | 1.0  |       |      |      |       |
| SDP-214 | 144   | 559.8 | 9.86  | 1.9  | 15.5  | 26.3 | 10.8 | 21.0  |
| SDP-213 | 143   | 560.2 | 9.32  | 2.4  |       |      |      |       |
| SDP-212 | 142   | 560.4 | 9.17  | 2.2  | 9.4   | 23.8 | 14.4 | 74.1  |
| SDP-211 | 139.5 | 561   | 9.96  | 1.9  | 7.6   | 40.5 | 32.9 | 157.8 |
| SDP-210 | 136.7 | 561.6 | 12.62 | 1.0  |       |      |      |       |
| SDP-209 | 134.2 | 562.1 | 9.18  | 1.7  |       | 47.6 |      | 39.1  |
| SDP-208 | 132.8 | 562.4 | 10.13 | 1.8  |       |      |      |       |
| SDP-206 | 128   | 563.4 | 12.26 | -2.1 |       |      |      |       |
| SDP-205 | 124   | 564.3 | 11.97 |      | 7.4   | 13.6 | 6.2  | 35.7  |
| SDP-204 | 123.5 | 564.4 | 11.54 |      | 4.2   |      |      |       |
| SDP-203 | 122.7 | 564.5 | 11.11 | 1.2  | 5.2   | 14.6 | 9.4  | 93.2  |
| SDP-143 | 114.7 | 566.2 | 8.6   | 1.6  | 13.7  |      |      |       |
| SDP-142 | 114.1 | 566.4 | 8.0   | 1.7  | 3.3   |      |      |       |
| SDP-140 | 113.2 | 566.6 | 7.6   | 2.1  | 35.6  |      |      |       |
| SDP-138 | 111.7 | 566.9 | 8.2   | 2.3  | 10.7  | 22.9 | 12.2 | 169.8 |
| SDP-135 | 110.5 | 567.1 | 9.6   | 2.6  | 21.0  |      |      |       |
| SDP-134 | 109.8 | 567.3 | 6.9   | 0.9  | 12.9  |      |      | 352.1 |
| SDP-133 | 108.6 | 567.5 | 7.2   | 1.7  | 13.8  |      |      |       |
| SDP-131 | 108.4 | 567.6 | 8.2   | 1.4  | 14.1  | 24.3 | 10.2 | 306.9 |
| SDP-130 | 108   | 567.7 | 8.0   | 0.5  |       |      |      |       |
| SDP-129 | 107.4 | 567.8 | 7.8   | 1.7  | 19.9  | 27.1 | 7.2  | 309   |
| SDP-128 | 106.7 | 567.9 | 7.1   | 1.9  | 13.1  |      |      |       |
| SDP-126 | 106   | 568.1 | 8.2   | 2.1  | 14.9  | 26.2 | 11.4 | 285.6 |
| SDP-125 | 105.1 | 568.3 | 6.9   | 2.0  | 12.2  |      |      |       |
| SDP-124 | 104.7 | 568.4 | 7.4   | 2.5  | 7.2   |      |      |       |
| SDP-123 | 104.2 | 568.5 | 7.4   | 2.3  | 16.4  |      |      |       |
| SDP-122 | 103.2 | 568.7 | 8.9   | 2.6  | 11.1  | 25.9 | 14.8 | 193   |
| SDP-121 | 103   | 568.7 | 8.2   | 2.9  | 14.1  |      |      |       |
| SDP-120 | 102.2 | 568.9 | 6.7   | 1.9  | 18.7  |      |      |       |
| SDP-119 | 101.3 | 569.1 | 7.5   | 1.5  | 14.6  |      |      |       |
| SDP-118 | 100.5 | 569.3 | 8.3   | 2.3  | 10.3  | 21.4 | 11.0 | 119.5 |

|         |      |       |      |     |      |      |      |       |
|---------|------|-------|------|-----|------|------|------|-------|
| SDP-117 | 99.5 | 569.5 | 9.7  | 0.9 | 10.4 |      |      |       |
| SDP-116 | 98.8 | 569.6 | 9.5  | 1.6 | 8.3  | 19.2 | 10.9 | 411.1 |
| SDP-114 | 97.7 | 569.9 | 9.4  | 1.8 | 20.0 |      |      |       |
| SDP-111 | 96.4 | 570.1 | 7.6  | 1.7 |      | 27.3 |      | 593.1 |
| SDP-110 | 96.1 | 570.2 | 8.6  | 2.1 | 5.3  |      |      |       |
| SDP-108 | 93.3 | 570.8 | 10.5 | 1.8 | 17.6 |      |      | 93.9  |
| SDP-106 | 92.1 | 571   | 9.6  | 1.5 | 21.2 |      |      |       |
| SDP-103 | 90.7 | 571.3 | 8.7  | 2.1 | 20.0 | 26.7 | 6.8  | 231.3 |
| SDP-101 | 89.7 | 571.6 | 9.2  | 2.1 | 19.7 |      |      |       |
| SDP-99  | 89   | 571.7 | 8.7  | 2.2 | 19.8 | 29.0 | 9.3  | 232.9 |
| SDP-97  | 87.7 | 572   | 7.7  | 1.2 | 13.3 |      |      |       |
| SDP-96  | 87   | 572.1 | 7.0  | 1.2 | 13.2 | 11.9 | -1.3 | 284.1 |
| SDP-95  | 86.2 | 572.3 | 7.7  | 1.8 | 11.2 |      |      |       |
| SDP-94  | 85.4 | 572.5 | 10.8 | 0.1 |      | 19.7 |      | 117.7 |
| SDP-92  | 84.5 | 572.7 | 8.4  | 1.4 | 17.5 |      |      |       |
| SDP-91  | 84   | 572.8 | 10.8 | 1.2 | 22.2 | 26.3 | 4.0  | 84.8  |
| SDP-89  | 82.7 | 573   | 9.7  | 2.7 | 28.8 |      |      |       |
| SDP-88  | 81.9 | 573.2 | 10.4 | 4.0 |      | 23.5 |      | 94.0  |
| SDP-86  | 80.7 | 573.5 | 8.9  | 4.3 | 30.9 |      |      |       |
| SDP-84  | 79.2 | 573.8 | 9.6  | 4.5 | 32.5 | 24.3 | -8.2 | 87.0  |
| SDP-83  | 78.6 | 573.9 | 6.9  | 4.3 | 28.2 |      |      |       |
| SDP-82  | 77.6 | 574.1 | 8.7  | 4.4 | 29.1 | 19.2 | -9.9 | 111.2 |
| SDP-81  | 76.8 | 574.3 | 11.4 | 4.5 | 30.8 |      |      |       |
| SDP-80  | 75.4 | 574.6 | 8.5  | 4.7 | 34.6 | 25.5 | -9.1 |       |
| SDP-78  | 74.2 | 574.9 | 8.6  | 4.6 | 28.1 |      |      |       |
| SDP-76  | 73.5 | 575   | 11.7 | 4.6 | 32.1 |      |      |       |

**Notes:**

<sup>a</sup> All C-S isotope and [CAS] data of Jiulongwan (JLW) and Siduping (SDP) samples are from this study, Li et al. (2010, 2017), whereas data for SSFT-labeled samples are from McFadden et al. (2008).

Table DR2: Sulfur chemostratigraphic comparison in stages between inner-shelf Jiulongwan (JLW) and upper-slope Siduping (SDP) sections

| JLW                                                |       | EP2           | EN3a          | EN3b          |                | EN3c          |                |
|----------------------------------------------------|-------|---------------|---------------|---------------|----------------|---------------|----------------|
|                                                    |       |               |               | EN3b-1        | EN3b-2         |               |                |
| $\delta^{34}\text{S}_{\text{py}}$ <sup>a</sup>     | (‰)   | 23.9±7.5 (6)  | 0.8±5.2 (11)  | -2.7±9.9 (10) | -9.5±2.8 (12)  |               | -10.7±2 (4)    |
| $\delta^{34}\text{S}_{\text{CAS}}$ <sup>a</sup>    | (‰)   | 35.3±3.9 (4)  | 24.4±5.5 (10) | 16.5±2.4 (9)  | 26.9±4.1 (5)   |               | 16.5±1.7 (6)   |
| $\Delta^{34}\text{S}_{\text{CAS-py}}$ <sup>a</sup> | (‰)   | 9.9±3.8 (3)   | 23.9±8.9 (6)  | 17.6±7.1 (8)  | 36.3±4.9 (5)   |               | 28.8±1.5 (3)   |
| [CAS] <sup>b</sup>                                 | (ppm) | 248 (129-366) | 529 (442-926) | 652 (301-832) | 586 (115-1203) |               | 795 (675-1537) |
| SDP                                                |       | EP2           | EN3a          | EN3b          |                | EN3c          |                |
|                                                    |       |               |               | EN3b-1        | EN3b-2         | EN3c-1        | EN3c-2         |
| $\delta^{34}\text{S}_{\text{py}}$ <sup>a</sup>     | (‰)   | 30.6±2.2 (9)  | 15.5±4.4 (5)  | 14.1±6.6 (31) | 10.8±4.1 (3)   | -4.5±4.2 (8)  | 3.2±3.1 (18)   |
| $\delta^{34}\text{S}_{\text{CAS}}$ <sup>a</sup>    | (‰)   | 23.2±2.7 (4)  | 19.3±7.2 (3)  | 23.2±5.1 (12) | 34.5±11.4 (4)  | 14.7±13.4 (3) | 7.6±2.0 (6)    |
| $\Delta^{34}\text{S}_{\text{CAS-py}}$ <sup>a</sup> | (‰)   | -9.1±0.9 (3)  | 1.4±3.7 (2)   | 9.9±2.6 (11)  | 19.4±11.9 (3)  | 20.6±8.3 (3)  | 3.3±1.2 (6)    |
| [CAS] <sup>b</sup>                                 | (ppm) | 94 (89-106)   | 118 (95-231)  | 232 (96-349)  | 57 (30-118)    | 93 (78-524)   | 87 (30-152)    |

**Notes:**

<sup>a</sup> Data are given as mean±1σ (n).

<sup>b</sup> Data are given as median (16<sup>th</sup>-84<sup>th</sup> percentiles).

Table DR3:  $[\text{SO}_4^{2-}]_{\text{sw}}$  modeled for the Shuram Excursion at each study section

| JLW section |      | Age <sup>a</sup><br><br>(Ma) | Depth<br><br>(m) | Sed. Rate <sup>b</sup><br><br>(m Myr <sup>-1</sup> ) | $\Delta^{34}\text{S}_{\text{sulfate-py}}$<br>(‰) |      | $\delta^{34}\text{S}_{\text{CAS}}/\partial t$<br>(‰ Myr <sup>-1</sup> ) |      | $[\text{SO}_4^{2-}]_{\text{sw}}$ <sup>c</sup><br>(mM) |                   |                   |
|-------------|------|------------------------------|------------------|------------------------------------------------------|--------------------------------------------------|------|-------------------------------------------------------------------------|------|-------------------------------------------------------|-------------------|-------------------|
|             |      |                              |                  |                                                      | Avg.                                             | Max. | Avg.                                                                    | Max. | Min.                                                  | Avg.              | Max.              |
| EN3c        |      | 560-551                      | 142-154          | 1.56                                                 | 28.8                                             | 29.9 | 3.2                                                                     | 5.8  | 11.0 <sup>d</sup>                                     | 20.0 <sup>d</sup> | 20.7 <sup>d</sup> |
| EN3b        | 3b-2 | 575-560                      | 135-142          | 4.0                                                  | 36.4                                             | 47.9 | 19.8                                                                    | 40.0 | 2.0                                                   | 4.1               | 5.4               |
|             | 3b-1 |                              | 115-135          |                                                      | 17.6                                             | 29.4 | 4.5                                                                     | 9.4  | 4.2                                                   | 8.7               | 14.5              |
| EN3a        |      |                              | 93-115           |                                                      | 23.9                                             | 36.5 | 12.8                                                                    | 28.0 | 1.9                                                   | 4.1               | 6.3               |
| EP2         |      |                              | 80-93            |                                                      | 9.9                                              | 14.0 | 6.2                                                                     | 12.2 | 1.8                                                   | 3.5               | 5.0               |
| SDP section |      | Age <sup>a</sup><br><br>(Ma) | Depth<br><br>(m) | Sed. Rate <sup>b</sup><br><br>(m Myr <sup>-1</sup> ) | $\Delta^{34}\text{S}_{\text{sulfate-py}}$<br>(‰) |      | $\delta^{34}\text{S}_{\text{CAS}}/\partial t$<br>(‰ Myr <sup>-1</sup> ) |      | $[\text{SO}_4^{2-}]_{\text{sw}}$ <sup>c</sup><br>(mM) |                   |                   |
|             |      |                              |                  |                                                      | Avg.                                             | Max. | Avg.                                                                    | Max. | Min.                                                  | Avg.              | Max.              |
| EN3c        | 3c-2 | 560-551                      | 158-166          | 2.5                                                  | 3.3                                              | 4.7  | 7.1                                                                     | 16.9 | 0.4                                                   | 1.0               | 1.5               |
|             | 3c-1 |                              | 143-158          |                                                      | 20.6                                             | 28.0 | 11.5                                                                    | 16.8 | 2.7                                                   | 4.0               | 5.4               |
| EN3b        | 3b-2 | 575-560                      | 128-143          | 4.7                                                  | 19.4                                             | 32.9 | 13.9                                                                    | 31.3 | 1.4                                                   | 3.1               | 5.3               |
|             | 3b-1 |                              | 87-128           |                                                      | 9.9                                              | 14.8 | 5.6                                                                     | 15.9 | 1.4                                                   | 3.9               | 5.9               |
| EN3a        |      |                              | 80-87            |                                                      | 4.0                                              | 4.0  | 22.4                                                                    | 22.7 | 0.4                                                   |                   | 0.4               |
| EP2         |      |                              | 73-80            |                                                      | -9.1                                             | -8.2 | —                                                                       |      | 0.0 <sup>e</sup>                                      |                   |                   |

**Notes:**



<sup>a</sup> Based on sequence stratigraphic correlation, we used the ages of ca. 575 Ma (disappearance of definitive mobile bilaterians; Narbonne, 2005; Xiao and Laflamme, 2009; Chen et al., 2014; Droser and Gehling, 2015), ca. 560 Ma (base of Doushantuo Member IV (i.e., Miaohe Member); Kendall et al., 2015), and ca. 551 Ma (top of the Doushantuo Member IV; Condon et al., 2005; Zhang et al., 2005) as anchors to constrain the age of individual data points from the South China sections.

<sup>b</sup> Sedimentation rate for each study unit is based on its thickness and duration.

<sup>c</sup> Based on methods developed in Algeo et al. (2015).

<sup>d</sup>  $\delta^{34}\text{S}$  data from Li et al. (2010) are for reference only, as  $\text{TIC} < 3\%$ .

<sup>e</sup> All  $\Delta^{34}\text{S}_{\text{sulfate-py}}$  in EP2 at SDP are  $< 0\%$ , implying  $[\text{SO}_4^{2-}]_{\text{sw}}$  close to zero.

Table DR4: Elemental concentration data used for S-isotope data quality evaluation in this

study <sup>a</sup>

| Sample                                         | Fe <sub>T</sub> | Ca      | Mg      | S <sub>py</sub> |
|------------------------------------------------|-----------------|---------|---------|-----------------|
|                                                | (wt. %)         | (wt. %) | (wt. %) | (wt. %)         |
| <i>Jiulongwan Section (Inner shelf facies)</i> |                 |         |         |                 |
| HN-23                                          | 3.3             | 2.7     | 2.0     | 2.3             |
| HN-21                                          | 2.7             | 6.0     | 3.9     | 1.2             |
| HN-20                                          |                 |         |         |                 |
| HN-19                                          |                 |         |         |                 |
| HN-18                                          | 2.3             | 3.3     | 2.4     | 1.1             |
| HN-17                                          |                 |         |         |                 |
| HN-16                                          |                 |         |         |                 |
| HN-15                                          | 2.7             | 2.1     | 1.9     | 1.6             |
| HN-13                                          | 2.9             | 3.5     | 2.5     | 1.2             |
| HN-09                                          | 2.8             | 2.0     | 1.8     | 2.3             |
| HN-12                                          | 3.1             | 1.8     | 1.6     | 2.5             |
| HN-11                                          | 3.2             | 1.6     | 1.4     | 2.5             |
| JLW-01                                         | 1.0             | 19.5    | 8.6     | 1.0             |
| HN-08                                          | 0.5             |         |         | 0.3             |
| JLW-02                                         |                 |         |         |                 |
| HN-10                                          | 0.7             | 26.8    | 6.0     | 0.4             |
| JLW-03                                         | 0.9             | 22.4    | 8.0     | 0.9             |
| JLW-04                                         |                 |         |         | 0.4             |
| HN-06                                          | 0.8             |         |         | 0.4             |
| JLW-05                                         | 0.8             | 22.0    | 7.8     |                 |
| JLW-06                                         | 0.6             | 28.4    | 5.9     | 0.4             |
| HN-07                                          | 0.7             | 25.4    | 5.8     | 0.3             |

|        |     |      |      |     |
|--------|-----|------|------|-----|
| JLW-07 | 0.3 | 37.2 | 0.8  |     |
| JLW-08 | 0.4 |      |      | 0.4 |
| JLW-09 | 0.3 | 37.7 | 0.4  |     |
| JLW-10 | 0.4 | 38.7 | 0.5  | 0.3 |
| JLW-11 | 0.7 | 31.4 | 2.3  |     |
| JLW-12 |     |      |      | 0.3 |
| JLW-13 | 0.6 | 38.4 | 0.6  |     |
| JLW-14 | 0.3 | 37.7 | 0.4  | 0.1 |
| JLW-15 |     |      |      |     |
| JLW-16 |     |      |      | 0.0 |
| JLW-17 | 0.4 | 37.9 | 0.4  |     |
| JLW-18 | 0.3 | 37.8 | 0.4  | 0.1 |
| JLW-19 | 0.5 | 35.7 | 0.9  |     |
| JLW-20 |     |      |      |     |
| JLW-21 |     |      |      | 0.2 |
| JLW-22 |     |      |      |     |
| JLW-23 | 0.4 | 37.2 | 0.6  | 0.3 |
| JLW-24 |     |      |      |     |
| JLW-25 |     |      |      | 0.3 |
| JLW-26 | 0.5 | 33.6 | 0.9  | 0.4 |
| JLW-27 |     |      |      |     |
| JLW-28 | 0.7 | 30.4 | 2.1  |     |
| JLW-29 | 0.4 | 34.6 | 0.7  | 0.3 |
| JLW-30 | 1.0 | 19.7 | 10.3 |     |
| JLW-31 | 0.8 | 20.8 | 9.6  | 0.0 |
| JLW-32 | 1.0 | 19.4 | 10.1 |     |
| JLW-33 | 0.7 | 19.3 | 10.0 | 0.0 |
| HN-05  | 0.6 |      |      | 0.3 |
| JLW-34 | 0.8 | 19.3 | 10.3 |     |
| JLW-35 | 0.6 | 20.8 | 11.0 | 0.0 |
| JLW-36 | 1.0 | 19.3 | 10.2 |     |
| JLW-37 | 1.1 | 18.0 | 9.5  |     |
| JLW-38 | 0.1 | 22.0 | 10.7 | 0.0 |
| JLW-39 |     |      |      |     |
| JLW-40 | 0.2 | 21.2 | 10.3 | 0.0 |
| JLW-41 |     |      |      |     |
| JLW-42 | 0.3 | 21.0 | 10.2 |     |
| HN-04  | 0.3 | 17.3 | 7.9  | 0.6 |
| JLW-43 |     |      |      |     |
| JLW-44 | 0.6 | 19.5 | 9.6  | 0.0 |
| JLW-45 |     |      |      |     |

|                                              |     |      |      |     |
|----------------------------------------------|-----|------|------|-----|
| JLW-46                                       |     |      |      |     |
| JLW-47                                       |     |      |      |     |
| JLW-48                                       | 0.3 | 20.8 | 9.8  | 0.0 |
| JLW-49                                       |     |      |      |     |
| HN-02                                        | 0.4 | 20.4 | 9.9  | 0.0 |
| JLW-50                                       |     |      |      | 0.0 |
| JLW-51                                       |     |      |      |     |
| JLW-52                                       |     |      |      |     |
| JLW-53                                       |     |      |      |     |
| JLW-54                                       |     | 19.6 | 9.5  | 0.0 |
| JLW-55                                       | 0.1 |      |      | 0.0 |
| HN-01                                        | 0.2 | 37.6 | 1.0  |     |
| JLW-56                                       | 0.1 | 19.5 | 10.4 |     |
| JLW-57                                       | 0.2 | 20.6 | 11.0 |     |
| <i>Siduping Section (Upper slope facies)</i> |     |      |      |     |
| SDP-154                                      | 2.9 | 0.0  | 0.2  | 2.8 |
| SDP-155                                      | 3.7 | 0.1  | 0.4  | 2.8 |
| SDP-156                                      |     | 0.1  | 0.4  | 3.2 |
| SDP-159                                      | 1.1 | 0.0  | 0.3  | 0.0 |
| SDP-161                                      | 0.9 | 0.0  | 0.2  | 0.4 |
| SDP-163                                      | 1.1 | 0.8  | 0.2  | 0.0 |
| SDP-164                                      |     |      |      | 0.0 |
| SDP-166                                      | 0.1 | 0.6  | 0.3  | 0.1 |
| SDP-167                                      | 2.6 | 0.0  | 0.6  | 2.6 |
| SDP-168                                      |     |      |      | 6.4 |
| SDP-169                                      |     |      |      |     |
| SDP-170                                      | 4.1 | 10.1 | 5.3  | 5.2 |
| SDP-171                                      |     |      |      |     |
| SDP-172                                      |     |      |      | 2.1 |
| SDP-173                                      | 1.3 | 16.7 | 8.2  |     |
| SDP-174                                      | 2.1 | 12.2 | 6.5  | 2.6 |
| SDP-175                                      |     |      |      |     |
| SDP-177                                      |     |      |      | 4.0 |
| SDP-178                                      | 0.9 | 17.0 | 8.3  | 1.1 |
| SDP-179                                      | 0.3 | 19.6 | 9.2  | 0.0 |
| SDP-180                                      |     |      |      | 1.0 |
| SDP-181                                      |     |      |      | 0.1 |
| SDP-182                                      | 0.2 | 19.8 | 9.4  |     |
| SDP-183                                      |     |      |      | 0.8 |
| SDP-184                                      | 0.9 | 15.9 | 7.8  |     |

|         |     |      |     |     |
|---------|-----|------|-----|-----|
| SDP-185 | 4.0 | 0.6  | 0.8 | 4.8 |
| SDP-186 |     |      |     | 2.9 |
| SDP-188 | 3.5 |      |     | 3.1 |
| SDP-191 | 0.2 |      |     | 3.3 |
| SDP-192 |     | 19.7 | 9.1 |     |
| SDP-193 | 0.2 | 2.9  | 1.8 | 0.1 |
| SDP-194 | 2.1 | 0.0  | 0.8 | 0.0 |
| SDP-195 |     |      |     | 0.6 |
| SDP-197 |     |      |     | 0.6 |
| SDP-198 |     |      |     |     |
| SDP-199 | 0.0 | 7.4  | 4.2 |     |
| SDP-200 |     |      |     | 0.9 |
| SDP-201 | 0.0 | 6.7  | 3.9 |     |
| SDP-202 | 0.1 | 12.8 | 6.7 | 0.0 |
| SDP-215 |     |      |     |     |
| SDP-214 |     |      |     | 0.0 |
| SDP-213 |     |      |     |     |
| SDP-212 | 0.8 | 15.5 | 9.3 | 0.0 |
| SDP-211 |     |      |     | 0.1 |
| SDP-210 | 0.1 | 19.7 | 9.6 | 0.0 |
| SDP-209 |     |      |     | 0.0 |
| SDP-208 | 0.6 | 16.6 | 9.7 | 0.0 |
| SDP-206 | 0.0 | 20.5 | 9.8 | 0.0 |
| SDP-205 |     |      |     | 0.2 |
| SDP-204 | 0.4 | 18.7 | 9.5 | 0.4 |
| SDP-203 |     |      |     | 0.5 |
| SDP-143 |     |      |     |     |
| SDP-142 | 1.0 | 13.3 | 9.1 | 0.0 |
| SDP-140 |     |      |     | 0.3 |
| SDP-138 | 0.8 | 14.0 | 8.6 | 0.0 |
| SDP-135 |     |      |     | 0.2 |
| SDP-134 | 2.0 | 11.6 | 8.6 | 0.4 |
| SDP-133 |     |      |     |     |
| SDP-131 | 1.2 | 14.2 | 9.0 | 1.3 |
| SDP-130 |     |      |     | 0.5 |
| SDP-129 | 1.5 | 13.1 | 8.9 | 0.8 |
| SDP-128 |     |      |     | 0.6 |
| SDP-126 | 1.5 | 13.7 | 8.9 | 0.6 |
| SDP-125 |     |      |     | 0.7 |
| SDP-124 | 1.6 | 12.4 | 8.6 | 0.5 |
| SDP-123 |     |      |     | 0.1 |

|         |     |      |      |     |
|---------|-----|------|------|-----|
| SDP-122 | 1.1 | 15.1 | 9.2  | 0.4 |
| SDP-121 |     |      |      | 0.2 |
| SDP-120 | 1.6 | 11.9 | 8.9  | 0.4 |
| SDP-119 |     |      |      | 0.5 |
| SDP-118 |     |      |      | 0.5 |
| SDP-117 |     |      |      | 0.3 |
| SDP-116 | 0.8 | 16.9 | 9.8  | 0.3 |
| SDP-114 |     |      |      | 0.4 |
| SDP-111 | 1.4 | 13.5 | 9.7  | 0.5 |
| SDP-110 |     |      |      | 0.4 |
| SDP-108 | 0.4 | 17.8 | 10.1 | 0.1 |
| SDP-106 |     |      |      | 0.3 |
| SDP-103 | 1.0 | 14.6 | 7.3  | 0.4 |
| SDP-101 |     |      |      | 0.5 |
| SDP-99  | 0.6 | 15.3 | 9.9  | 0.4 |
| SDP-97  |     |      |      | 0.7 |
| SDP-96  | 0.9 | 11.9 | 9.6  | 0.9 |
| SDP-95  |     |      |      | 0.9 |
| SDP-94  | 0.1 | 17.0 | 11.0 |     |
| SDP-92  |     |      |      | 0.0 |
| SDP-91  |     |      |      | 0.0 |
| SDP-89  |     |      |      | 0.0 |
| SDP-88  |     |      |      | 0.0 |
| SDP-86  |     |      |      | 0.0 |
| SDP-84  | 0.1 | 17.0 | 11.0 | 0.0 |
| SDP-83  |     |      |      | 0.0 |
| SDP-82  | 0.1 | 15.1 | 11.2 |     |
| SDP-81  | 0.1 |      |      | 0.0 |
| SDP-80  |     |      |      | 0.0 |
| SDP-78  |     |      |      | 0.0 |
| SDP-76  |     |      |      | 0.0 |

Notes:

<sup>a</sup> Data for samples labeled with "HN" are from [Li et al. \(2010\)](#).

666 Table DR5: Results of age sensitivity analyses for Jiulongwan (JLW) and Siduping (SDP)

667 sections.

| <b>JLW(Ma)</b><br><b>EN3b-2</b> | <b>Accumulation rate</b><br><b>(m/Myr)</b> | <b><math>\delta^{34}\text{S}_{\text{CAS}}/\text{dt}</math></b><br><b>(avg. ‰/Myr)</b> | <b><math>[\text{SO}_4^{2-}]_{\text{sw}}</math></b><br><b>(mM)</b> |
|---------------------------------|--------------------------------------------|---------------------------------------------------------------------------------------|-------------------------------------------------------------------|
| -1 (574)                        | 4.3                                        | 20                                                                                    | 3.9                                                               |
| +1 (576)                        | 3.75                                       | 17.6                                                                                  | 4.6                                                               |
| -5 (570)                        | 6                                          | 23.5                                                                                  | 3.4                                                               |
| +5 (580)                        | 3                                          | 15.7                                                                                  | 5.1                                                               |
| -10 (565)                       | 12                                         | 39                                                                                    | 2                                                                 |
| +10 (585)                       | 2.4                                        | 14                                                                                    | 5.7                                                               |
| <b>JLW(Ma)</b><br><b>EN3b-1</b> | <b>Accumulation rate</b><br><b>(m/Myr)</b> | <b><math>\delta^{34}\text{S}_{\text{CAS}}/\text{dt}</math></b><br><b>(avg. ‰/Myr)</b> | <b><math>[\text{SO}_4^{2-}]_{\text{sw}}</math></b><br><b>(mM)</b> |
| -1 (574)                        | 4.3                                        | 5.4                                                                                   | 7.2                                                               |
| +1 (576)                        | 3.75                                       | 4.3                                                                                   | 9.1                                                               |
| -5 (570)                        | 6                                          | 7.6                                                                                   | 5.1                                                               |
| +5 (580)                        | 3                                          | 3.8                                                                                   | 10.2                                                              |
| -10 (565)                       | 12                                         | 15.2                                                                                  | 2.6                                                               |
| +10 (585)                       | 2.4                                        | 3                                                                                     | 13                                                                |
| <b>JLW(Ma)</b><br><b>EN3a</b>   | <b>Accumulation rate</b><br><b>(m/Myr)</b> | <b><math>\delta^{34}\text{S}_{\text{CAS}}/\text{dt}</math></b><br><b>(avg. ‰/Myr)</b> | <b><math>[\text{SO}_4^{2-}]_{\text{sw}}</math></b><br><b>(mM)</b> |
| -1 (574)                        | 4.3                                        | 13.3                                                                                  | 3.9                                                               |
| +1 (576)                        | 3.75                                       | 10.7                                                                                  | 4.9                                                               |
| -5 (570)                        | 6                                          | 17.2                                                                                  | 3.1                                                               |
| +5 (580)                        | 3                                          | 8.6                                                                                   | 6.1                                                               |
| -10 (565)                       | 12                                         | 34.3                                                                                  | 1.5                                                               |
| +10 (585)                       | 2.4                                        | 6.9                                                                                   | 7.6                                                               |
| <b>JLW(Ma)</b><br><b>EP2</b>    | <b>Accumulation rate</b><br><b>(m/Myr)</b> | <b><math>\delta^{34}\text{S}_{\text{CAS}}/\text{dt}</math></b><br><b>(avg. ‰/Myr)</b> | <b><math>[\text{SO}_4^{2-}]_{\text{sw}}</math></b><br><b>(mM)</b> |
| -1 (574)                        | 4.3                                        | 6.7                                                                                   | 3.3                                                               |
| +1 (576)                        | 3.75                                       | 5.85                                                                                  | 3.7                                                               |
| -5 (570)                        | 6                                          | 9.4                                                                                   | 2.3                                                               |
| +5 (580)                        | 3                                          | 4.7                                                                                   | 4.6                                                               |
| -10 (565)                       | 12                                         | 18.7                                                                                  | 1.2                                                               |
| +10 (585)                       | 2.4                                        | 3.75                                                                                  | 5.8                                                               |

668

| <b>SDP (Ma)</b><br><b>EN3c-2</b> | <b>Accumulation rate</b><br><b>(m/Myr)</b> | <b><math>\delta^{34}\text{S}_{\text{CAS}}/\text{dt}</math></b><br><b>(avg. ‰/Myr)</b> | <b><math>[\text{SO}_4^{2-}]_{\text{sw}}</math></b><br><b>(mM)</b> |
|----------------------------------|--------------------------------------------|---------------------------------------------------------------------------------------|-------------------------------------------------------------------|
| -1 (559)                         | 2.9                                        | 8.2                                                                                   | 0.9                                                               |

|                    |                              |                                          |                            |
|--------------------|------------------------------|------------------------------------------|----------------------------|
| +1 (561)           | 2.3                          | 6.5                                      | 1.1                        |
| -5 (555)           | 5.75                         | 16.3                                     | 0.5                        |
| +5 (565)           | 1.64                         | 4.7                                      | 1.5                        |
| SDP (Ma)<br>EN3c-1 | Accumulation rate<br>(m/Myr) | $d\delta^{34}S_{CAS}/dt$<br>(avg. ‰/Myr) | $[SO_4^{2-}]_{sw}$<br>(mM) |
| -1 (559)           | 2.9                          | 13.3                                     | 3.4                        |
| +1 (561)           | 2.3                          | 10.6                                     | 4.3                        |
| -5 (555)           | 5.75                         | 26.5                                     | 1.8                        |
| +5 (565)           | 1.64                         | 7.6                                      | 6                          |
| SDP (Ma)<br>EN3b-2 | Accumulation rate<br>(m/Myr) | $d\delta^{34}S_{CAS}/dt$<br>(avg. ‰/Myr) | $[SO_4^{2-}]_{sw}$<br>(mM) |
| -1 (574)           | 5                            | 15.2                                     | 2.8                        |
| +1 (576)           | 4.4                          | 13.6                                     | 3.2                        |
| -5 (570)           | 7                            | 20.9                                     | 2.1                        |
| +5 (580)           | 3.5                          | 10.9                                     | 3.9                        |
| -10 (565)          | 14                           | 40                                       | 1.1                        |
| +10 (585)          | 2.8                          | 8.9                                      | 4.8                        |
| SDP (Ma)<br>EN3b-1 | Accumulation rate<br>(m/Myr) | $d\delta^{34}S_{CAS}/dt$<br>(avg. ‰/Myr) | $[SO_4^{2-}]_{sw}$<br>(mM) |
| -1 (574)           | 5                            | 6                                        | 3.7                        |
| +1 (576)           | 4.4                          | 5.3                                      | 4.1                        |
| -5 (570)           | 7                            | 8.3                                      | 2.6                        |
| +5 (580)           | 3.5                          | 4.2                                      | 5.2                        |
| -10 (565)          | 14                           | 16.7                                     | 1.3                        |
| +10 (585)          | 2.8                          | 3.4                                      | 6.4                        |
| SDP (Ma)<br>EN3a   | Accumulation rate<br>(m/Myr) | $d\delta^{34}S_{CAS}/dt$<br>(avg. ‰/Myr) | $[SO_4^{2-}]_{sw}$<br>(mM) |
| -1 (574)           | 5                            | 23.8                                     | 0.4                        |
| +1 (576)           | 4.4                          | 21                                       | 0.4                        |
| -5 (570)           | 7                            | 33.4                                     | 0.3                        |
| +5 (580)           | 3.5                          | 16.7                                     | 0.5                        |
| -10 (565)          | 14                           | 66                                       | 0.15                       |
| +10 (585)          | 2.8                          | 13.4                                     | 0.65                       |

669

670 Table DR6: Modeling results of oceanic sulfate residence time

| Mean oceanic $SO_4^{2-}$ reservoir<br>(times of modern level) or (mM) | Riverine sulfate flux<br>(times of modern level) | Residence time<br>(years) |
|-----------------------------------------------------------------------|--------------------------------------------------|---------------------------|
| 1/15 or 2                                                             | 400                                              | 2000                      |
| 1/30 or 1                                                             | 200                                              | 2000                      |

|              |     |      |
|--------------|-----|------|
| 1/50 or 0.6  | 120 | 2000 |
| 1/100 or 0.3 | 60  | 2000 |
| 1/300 or 0.1 | 20  | 2000 |



Supplementary Figures

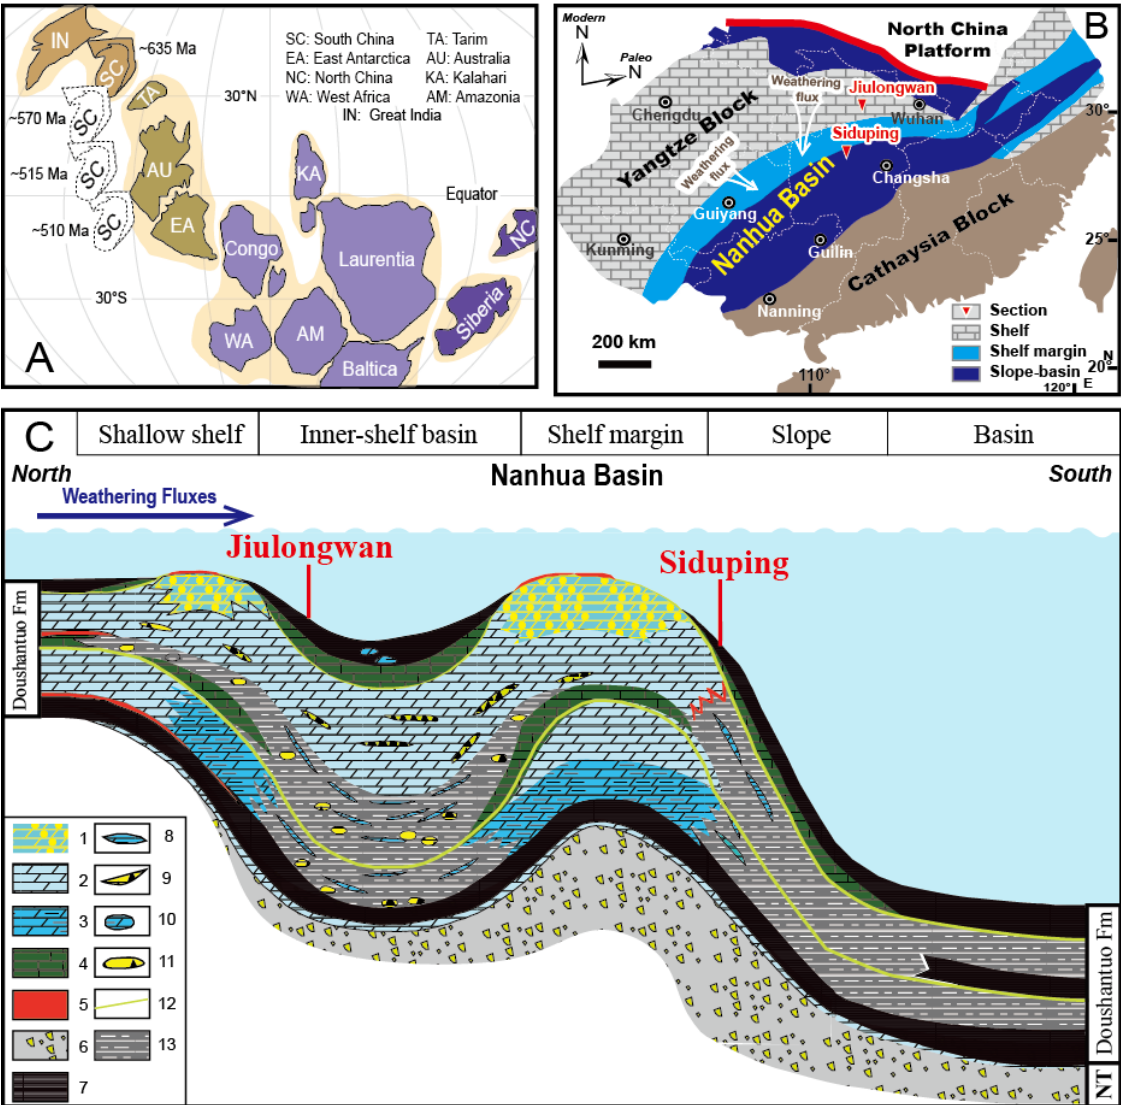

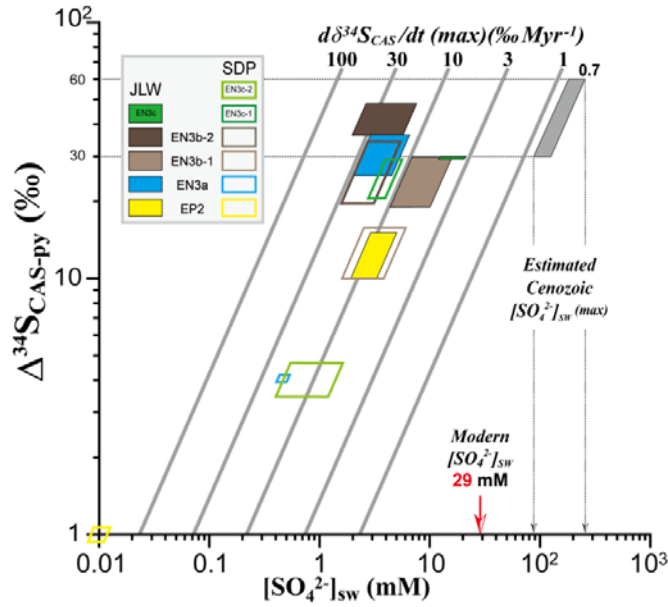

Figure DR2: Estimation of  $[\text{SO}_4^{2-}]_{\text{sw}}$  for individual units of the Jiulongwan (JLW) and Siduping (SDP) sections during the Shuram Excursion, based on the ‘rate method’ of [Algeo et al. \(2015\)](#). The parallelograms represent measured values of  $\partial\delta^{34}\text{S}_{\text{CAS}}/\partial t(\text{max})$ , i.e., the maximum rate of change of  $\delta^{34}\text{S}_{\text{CAS}}$ , and  $\Delta^{34}\text{S}_{\text{CAS-py}}$ , i.e., fractionation of S isotopes between CAS and pyrite. The median and range of  $[\text{SO}_4^{2-}]_{\text{sw}}$  estimates are read by projecting values from the parallelograms to the abscissa. As an example, the light gray parallelogram represents values for Cenozoic marine CAS, which yields  $[\text{SO}_4^{2-}]_{\text{sw}}$  estimates that are only slightly higher than the modern  $[\text{SO}_4^{2-}]_{\text{sw}}$  of ~29 mM ([Millero, 2005](#)).

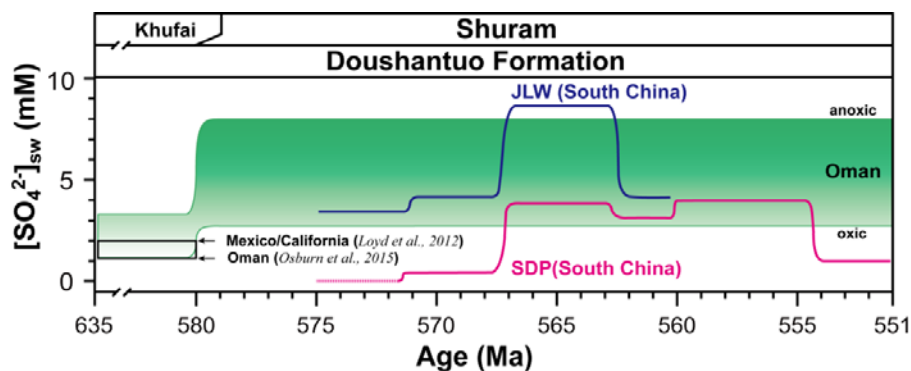

Figure DR3: A rough estimation of shelf marine sulfate concentrations during the Shuram Excursion in Oman (green band) using “rate method” in this study. The origin sulfur isotope dataset of Oman Khufai-Shuram Formation for modeling are from Fike et al. (2006). The upper boundary of green band corresponds to a pyrite burial flux equal to  $10 \times 10^{13} \text{ g yr}^{-1}$  when the ocean was completely anoxic; the lower boundary of green band corresponds to a pyrite burial flux equal to  $4 \times 10^{13} \text{ g yr}^{-1}$  when the ocean was oxic; the black box reflects two estimations of marine sulfate concentrations during per-Shuram period, which are from Loyd et al. (2012) (<2 mM for USA) and Osburn et al. (2015) (<1.2 mM for Oman), respectively. The modeling results of JLW (blue line) and SDP (carmine line) in South China are provided for comparison.

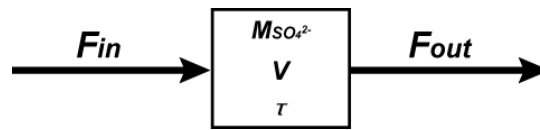

Figure DR4: A simple linear response system model for evaluating sulfate concentrations in marine systems.  $F_{in}$  is riverine sulfate flux into the ocean, and  $F_{out}$  is the sedimentary sink flux.  $M$  is oceanic sulfate mass,  $V$  is seawater volume, and  $\tau$  is the seawater residence time of sulfate.

715

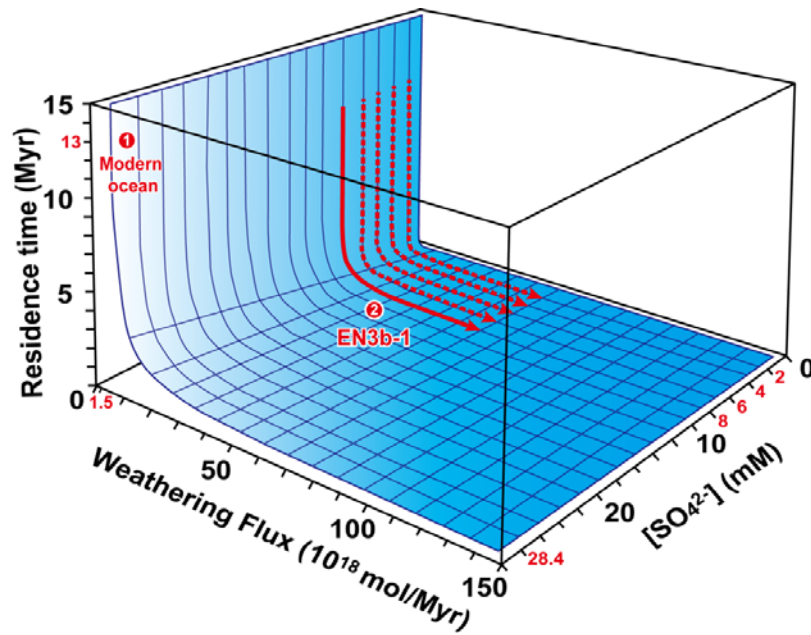

716

717 Figure DR5: A 3-D diagram showing the relationship between seawater sulfate  
 718 concentrations ( $[\text{SO}_4^{2-}]_{\text{sw}}$ ), sulfate weathering fluxes ( $F_{\text{in}}$ ), and oceanic sulfate residence  
 719 times ( $\tau$ ). Red circle 1 represents modern ocean conditions with  $[\text{SO}_4^{2-}]_{\text{sw}} = 28.4 \text{ mM}$ ,  $F_{\text{in}} =$   
 720  $1.5 \times 10^{18} \text{ mol Myr}^{-1}$ , and  $\tau = 13 \text{ Myr}$ ; red circle 2 and red trend lines represent the changes in  
 721  $\tau$  accompanying increased  $F_{\text{in}}$  using four different estimates of  $[\text{SO}_4^{2-}]_{\text{sw}}$  during SE EN3b-1.

722

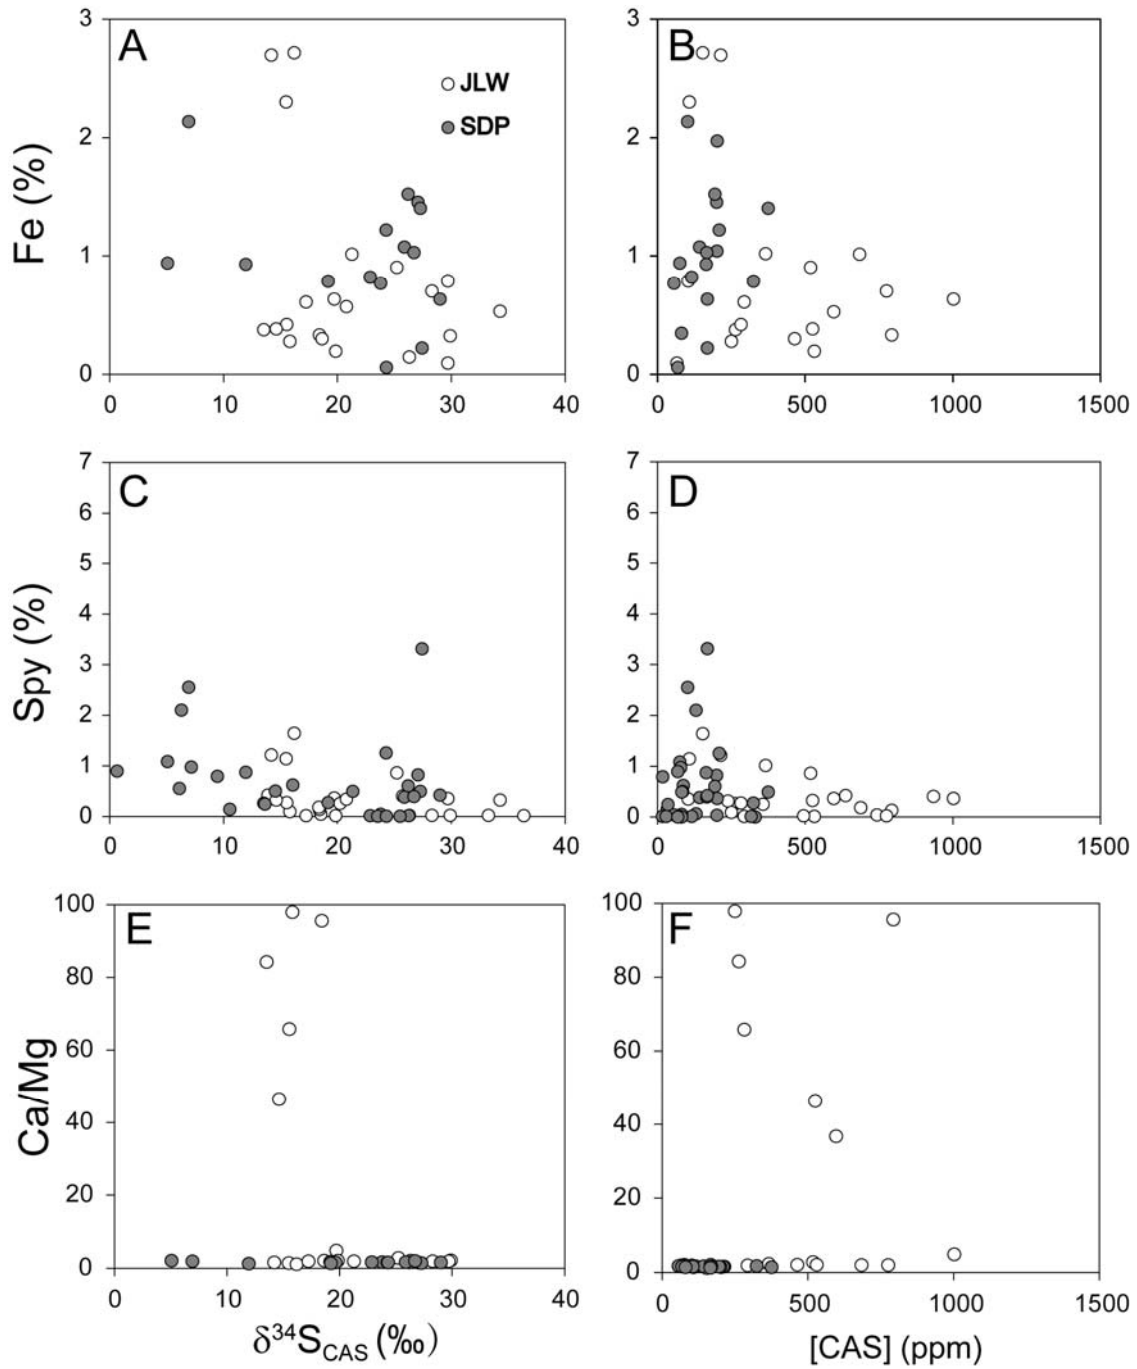

Figure DR6: Crossplots of  $\delta^{34}\text{S}_{\text{CAS}}$  versus (A) total Fe (Fe<sub>T</sub>), (C) pyrite sulfur (S<sub>py</sub>), and (E) Ca/Mg, and of [CAS] versus (B) total Fe (Fe<sub>T</sub>), (D) pyrite sulfur (S<sub>py</sub>), and (F) Ca/Mg. JLW = Jiulongwan and SDP = Siduping. All relationships yield  $R^2 < 0.1$ .

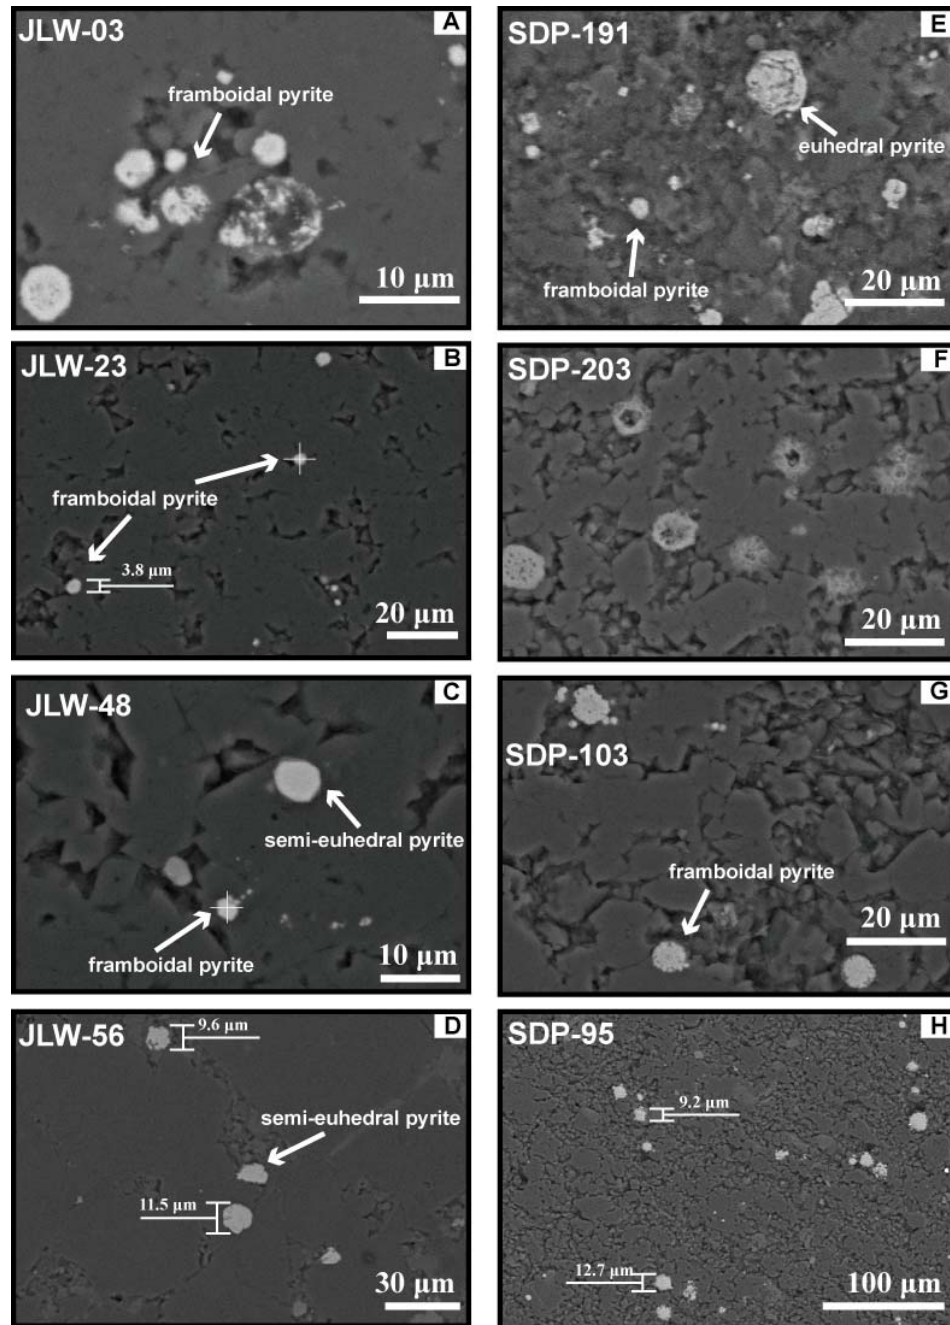

Figure DR7: Backscattered electron (BSE) images of typical pyrite framboids (A, B), abundant framboids with a few euhedral crystals (C, D) in JLW samples, co-occurring euhedral crystals with a few framboids (E) and typical pyrite framboids (F, G and H) in SDP samples.

734

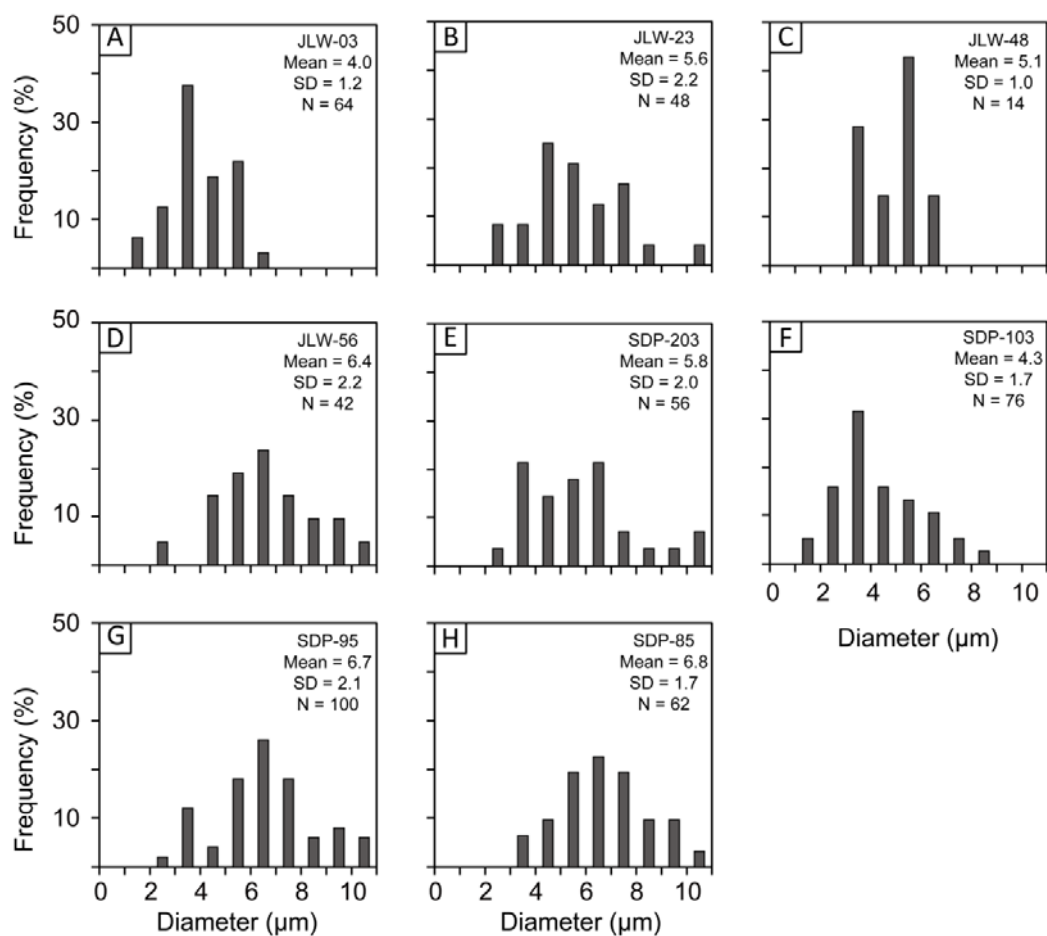

735

736

737 Figure DR8: Statistics of pyrite framboid size. A-D and E-H are for typical samples from

738 Jiulongwan (JLW) and Siduping (SDP) sections, respectively. SD = standard deviation.
